# Supplementary material for: The Curious Case of a Heterozygous Loss-of-Function PSEN1 variant associated with Early-Onset Alzheimer’s Disease
Source: Research Square preprint supplement (doi:10.21203/rs.3.rs-7222993/v1), 2025-08-27

# Supplementary file: Uncropped Gels and Blots

**Figure 3: *Psen1* c.325A>Tvariant results in full loss of function in homozygous neurons.**


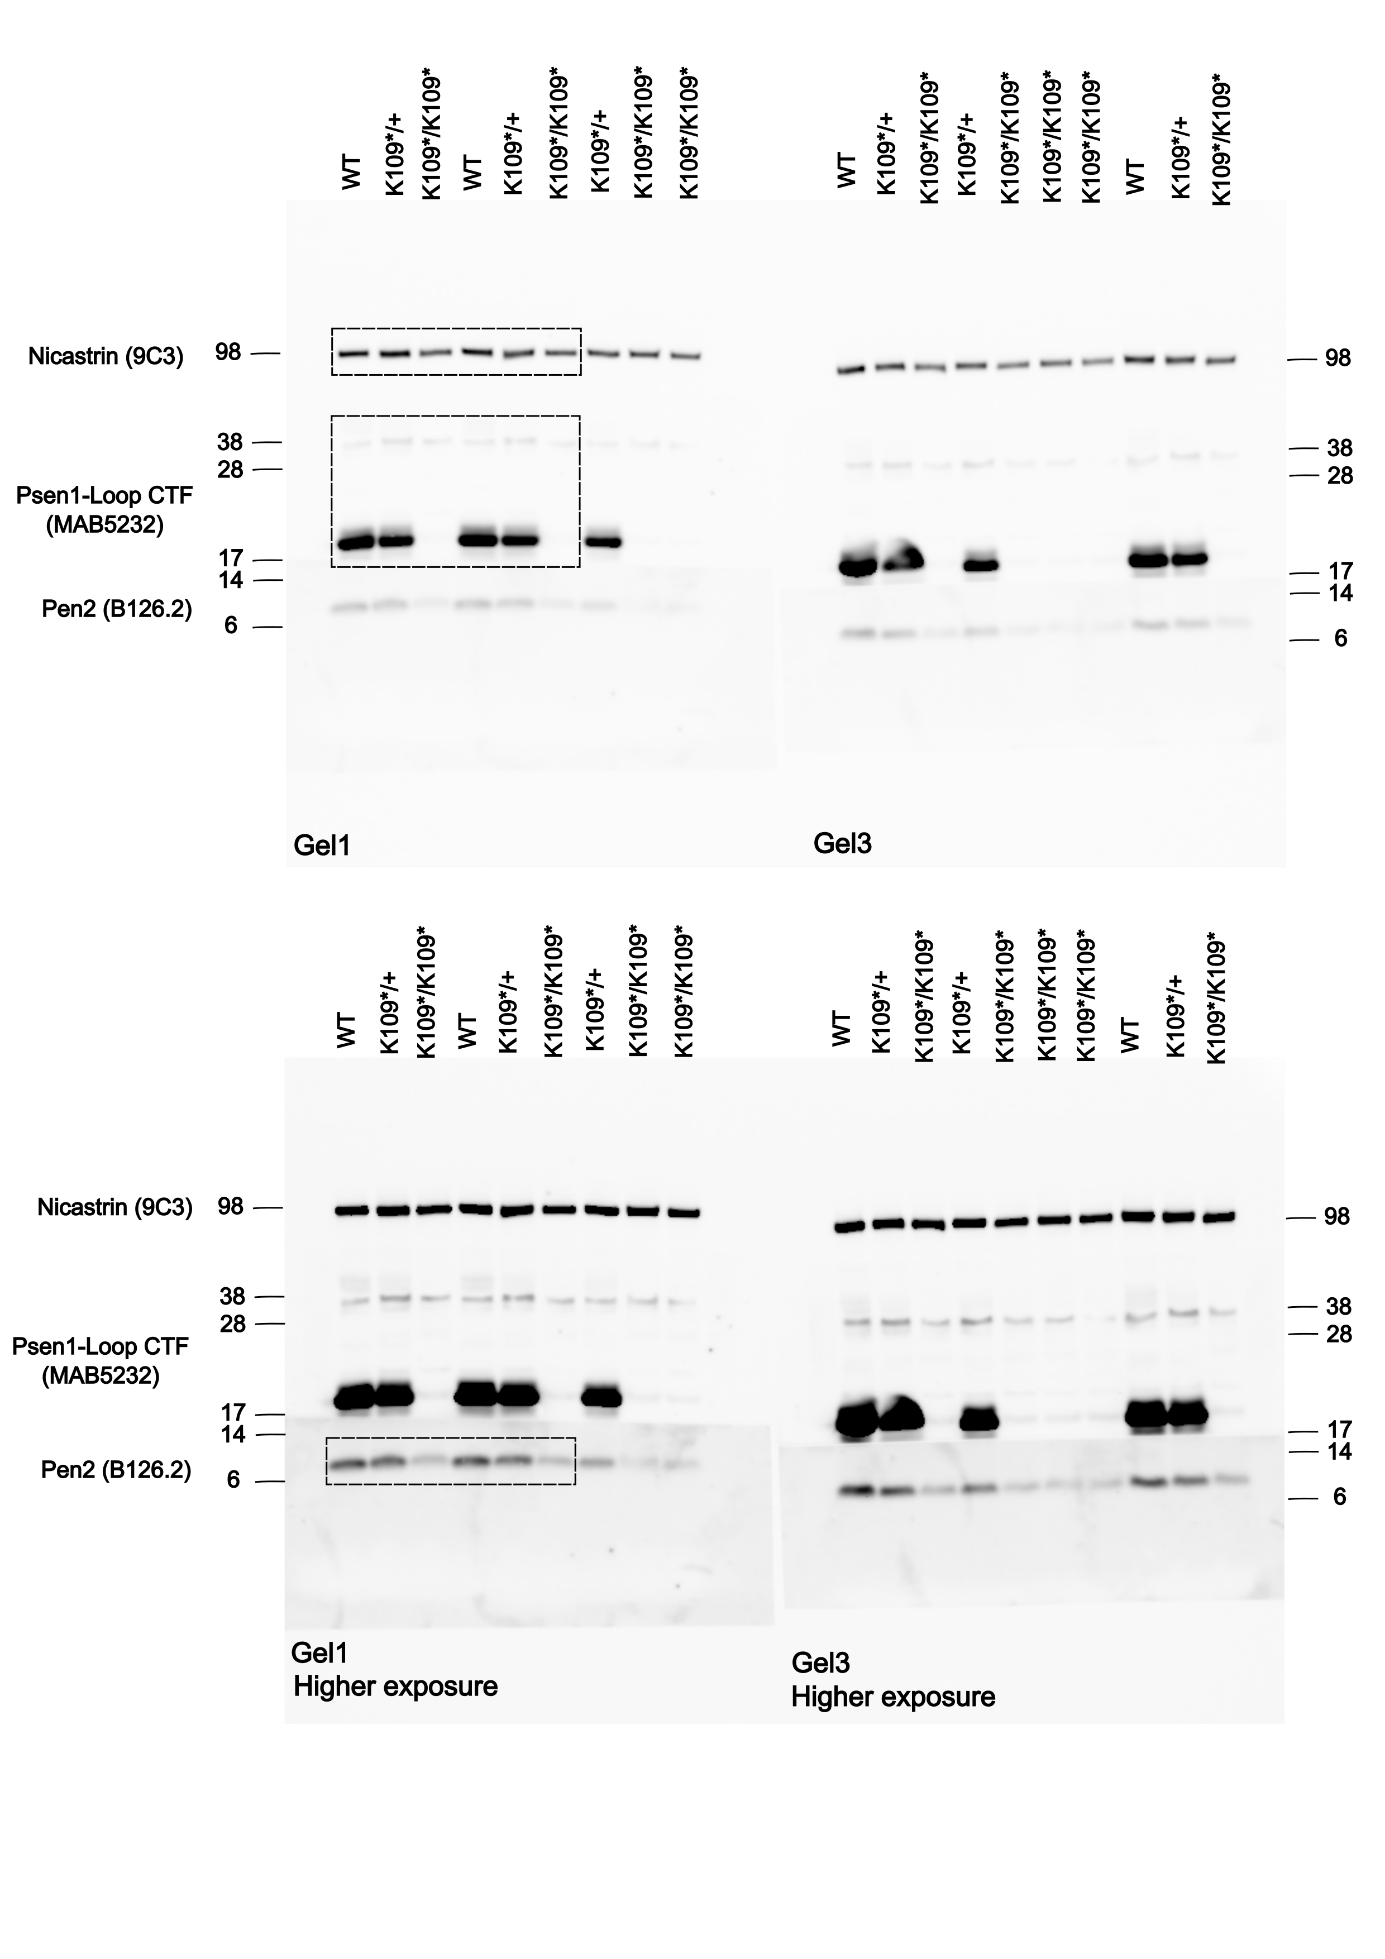


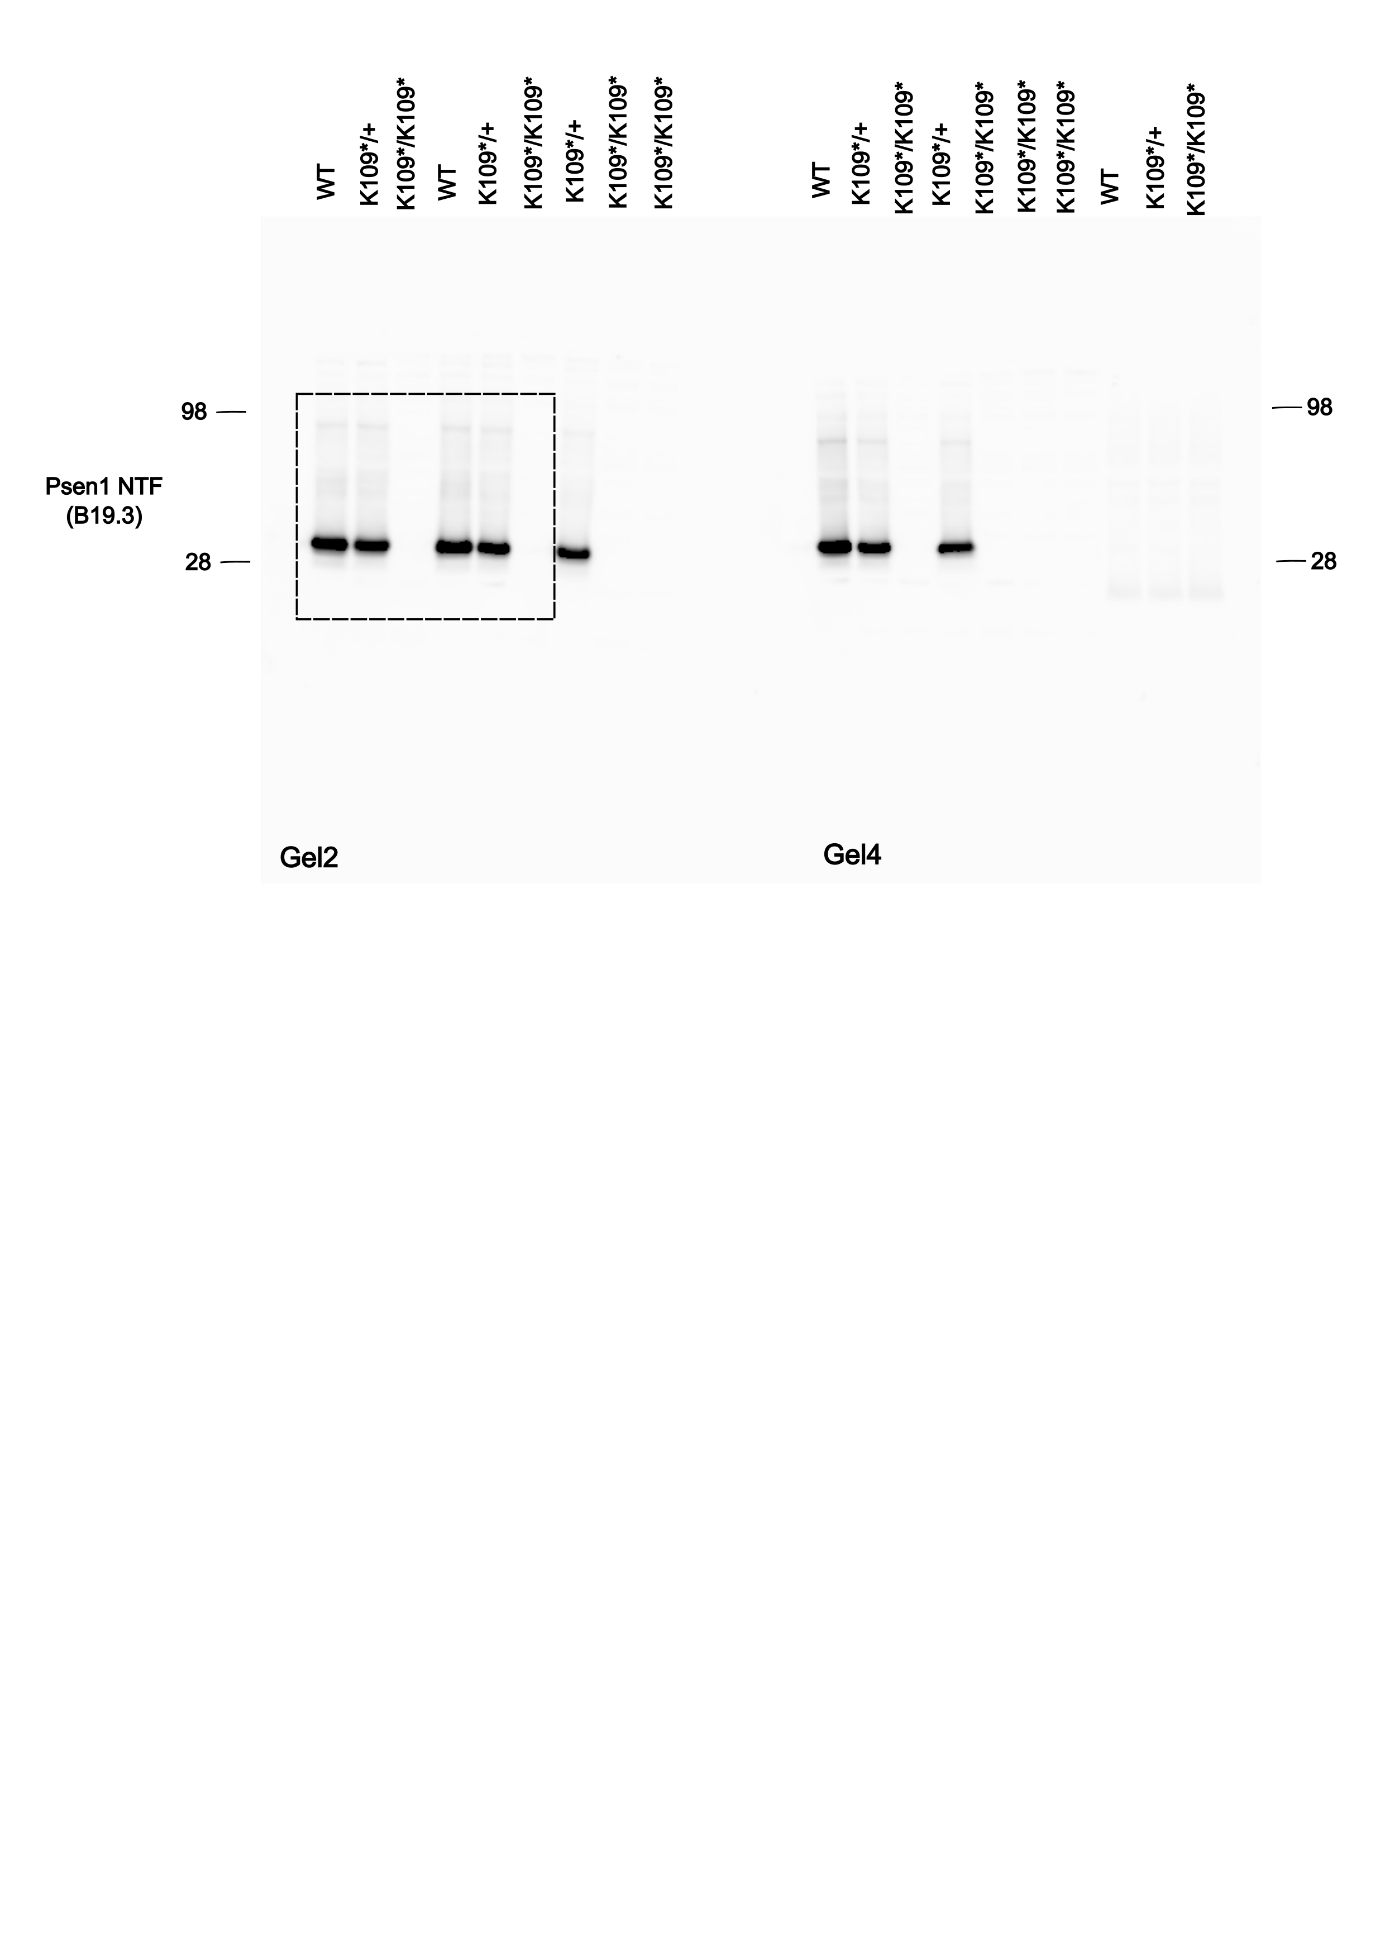

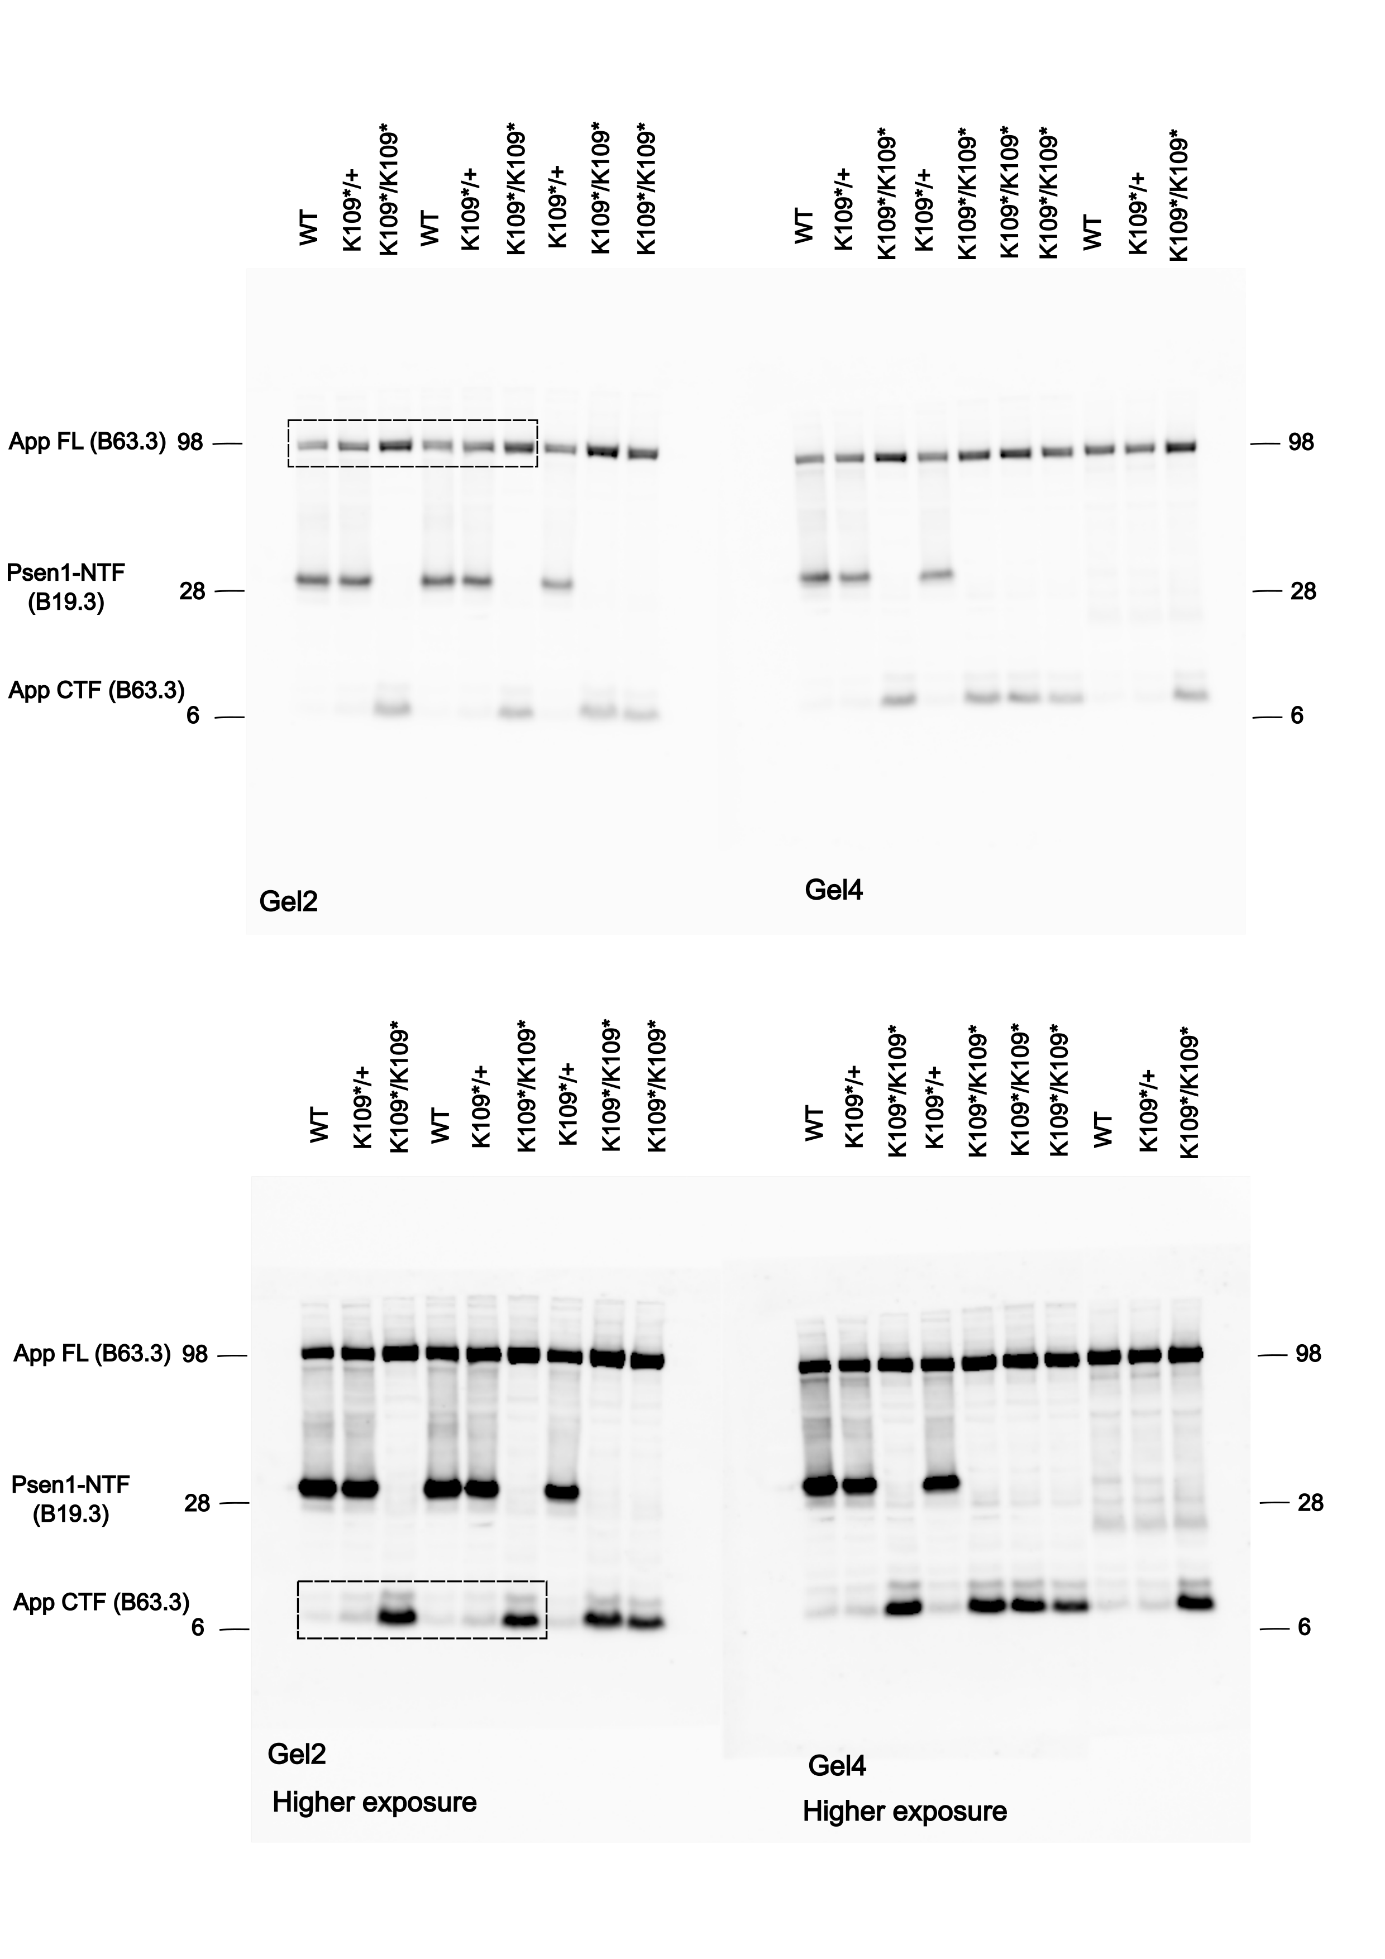


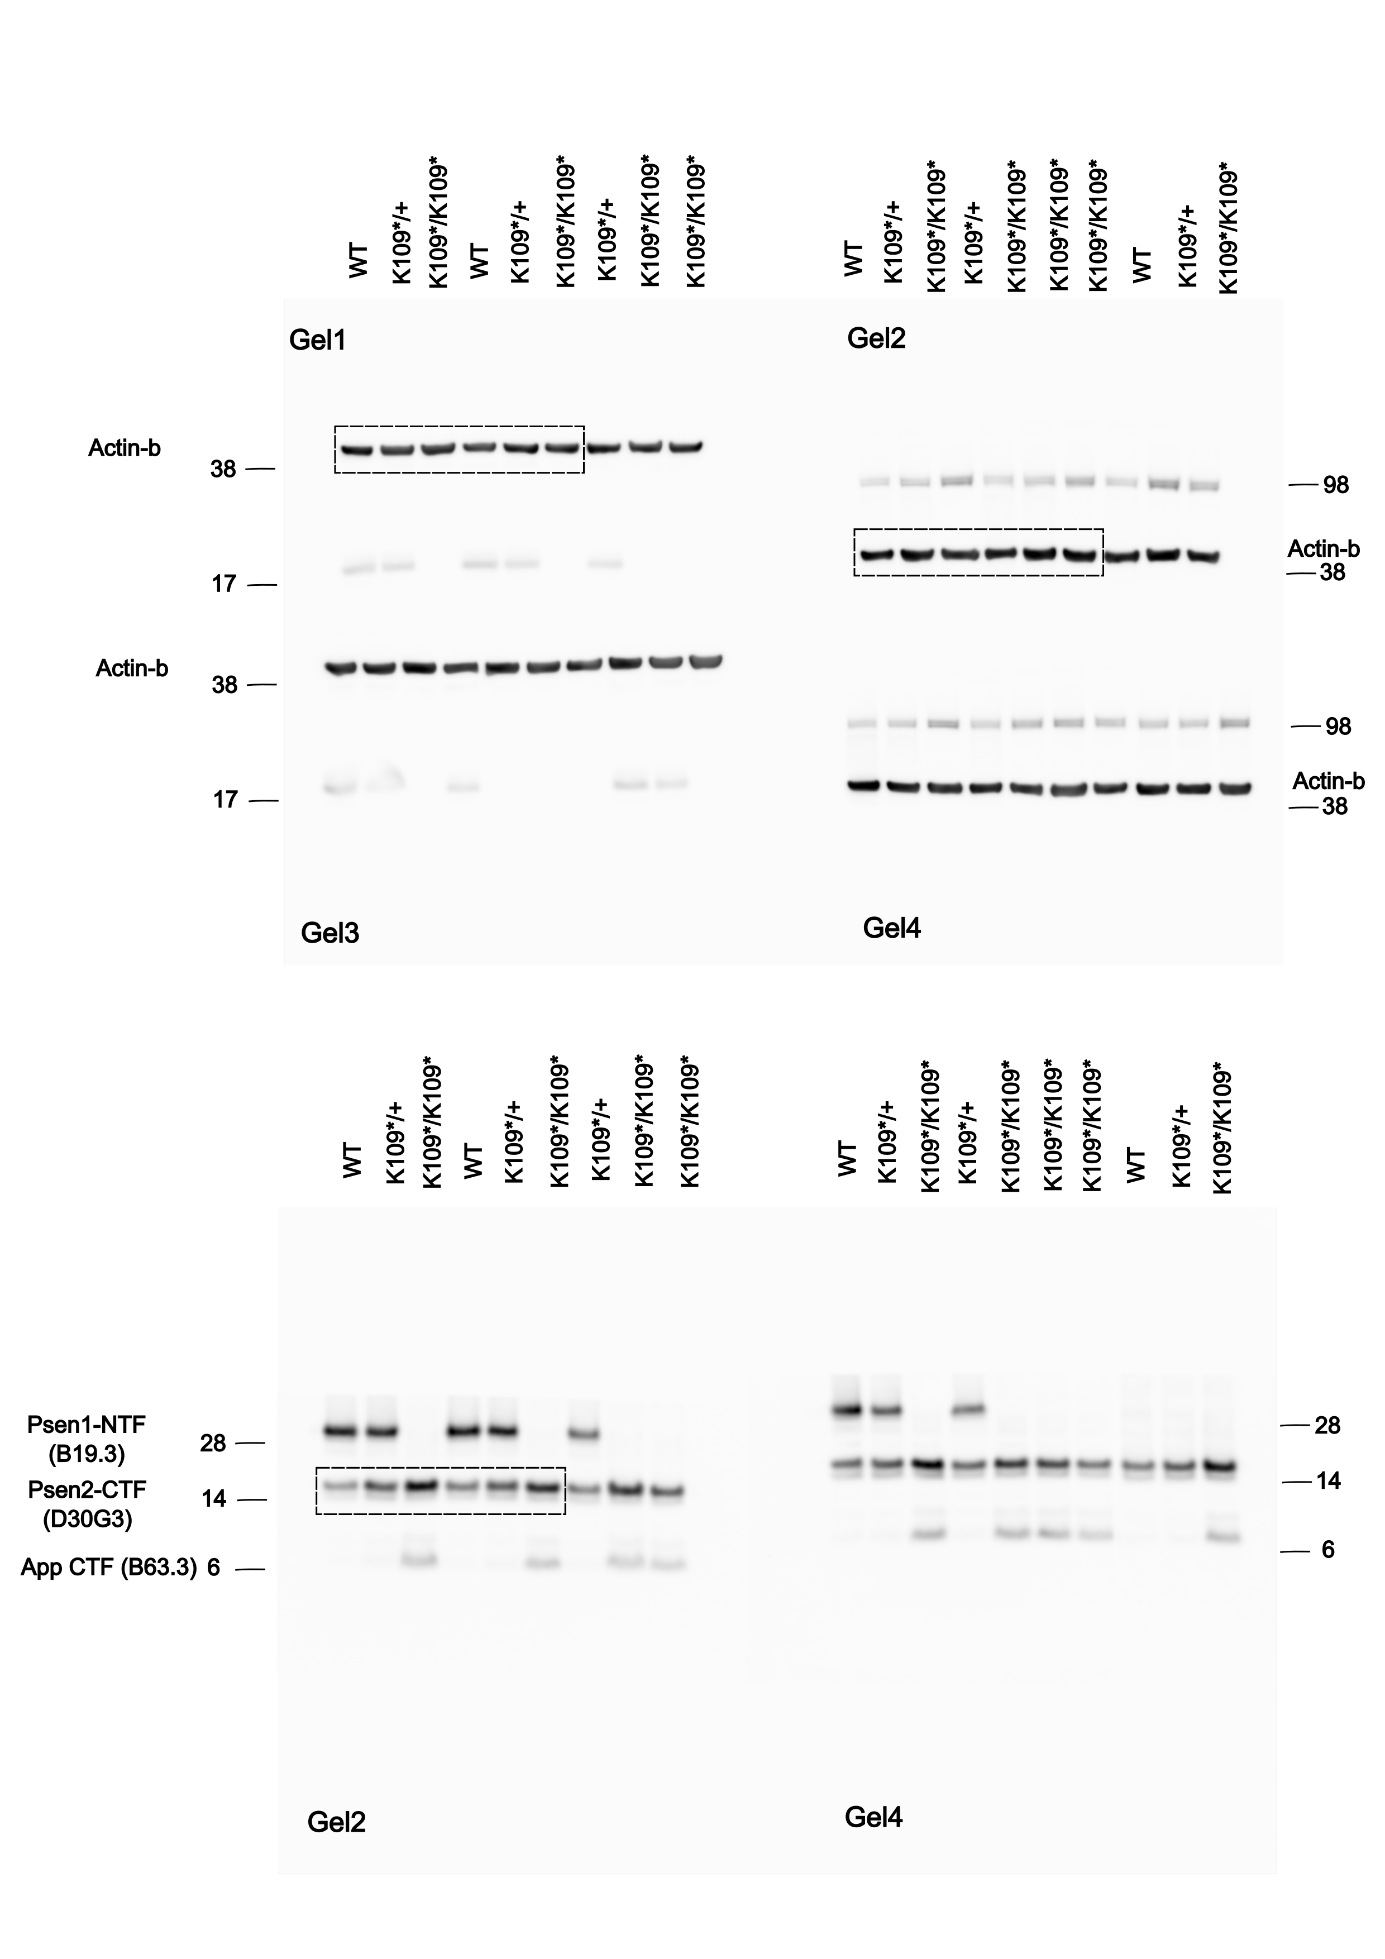


**Figure 4: Comparison of *Psen1K109*/+;Apphu/hu* and *Psen1+/-* aged heterozygous mice.**


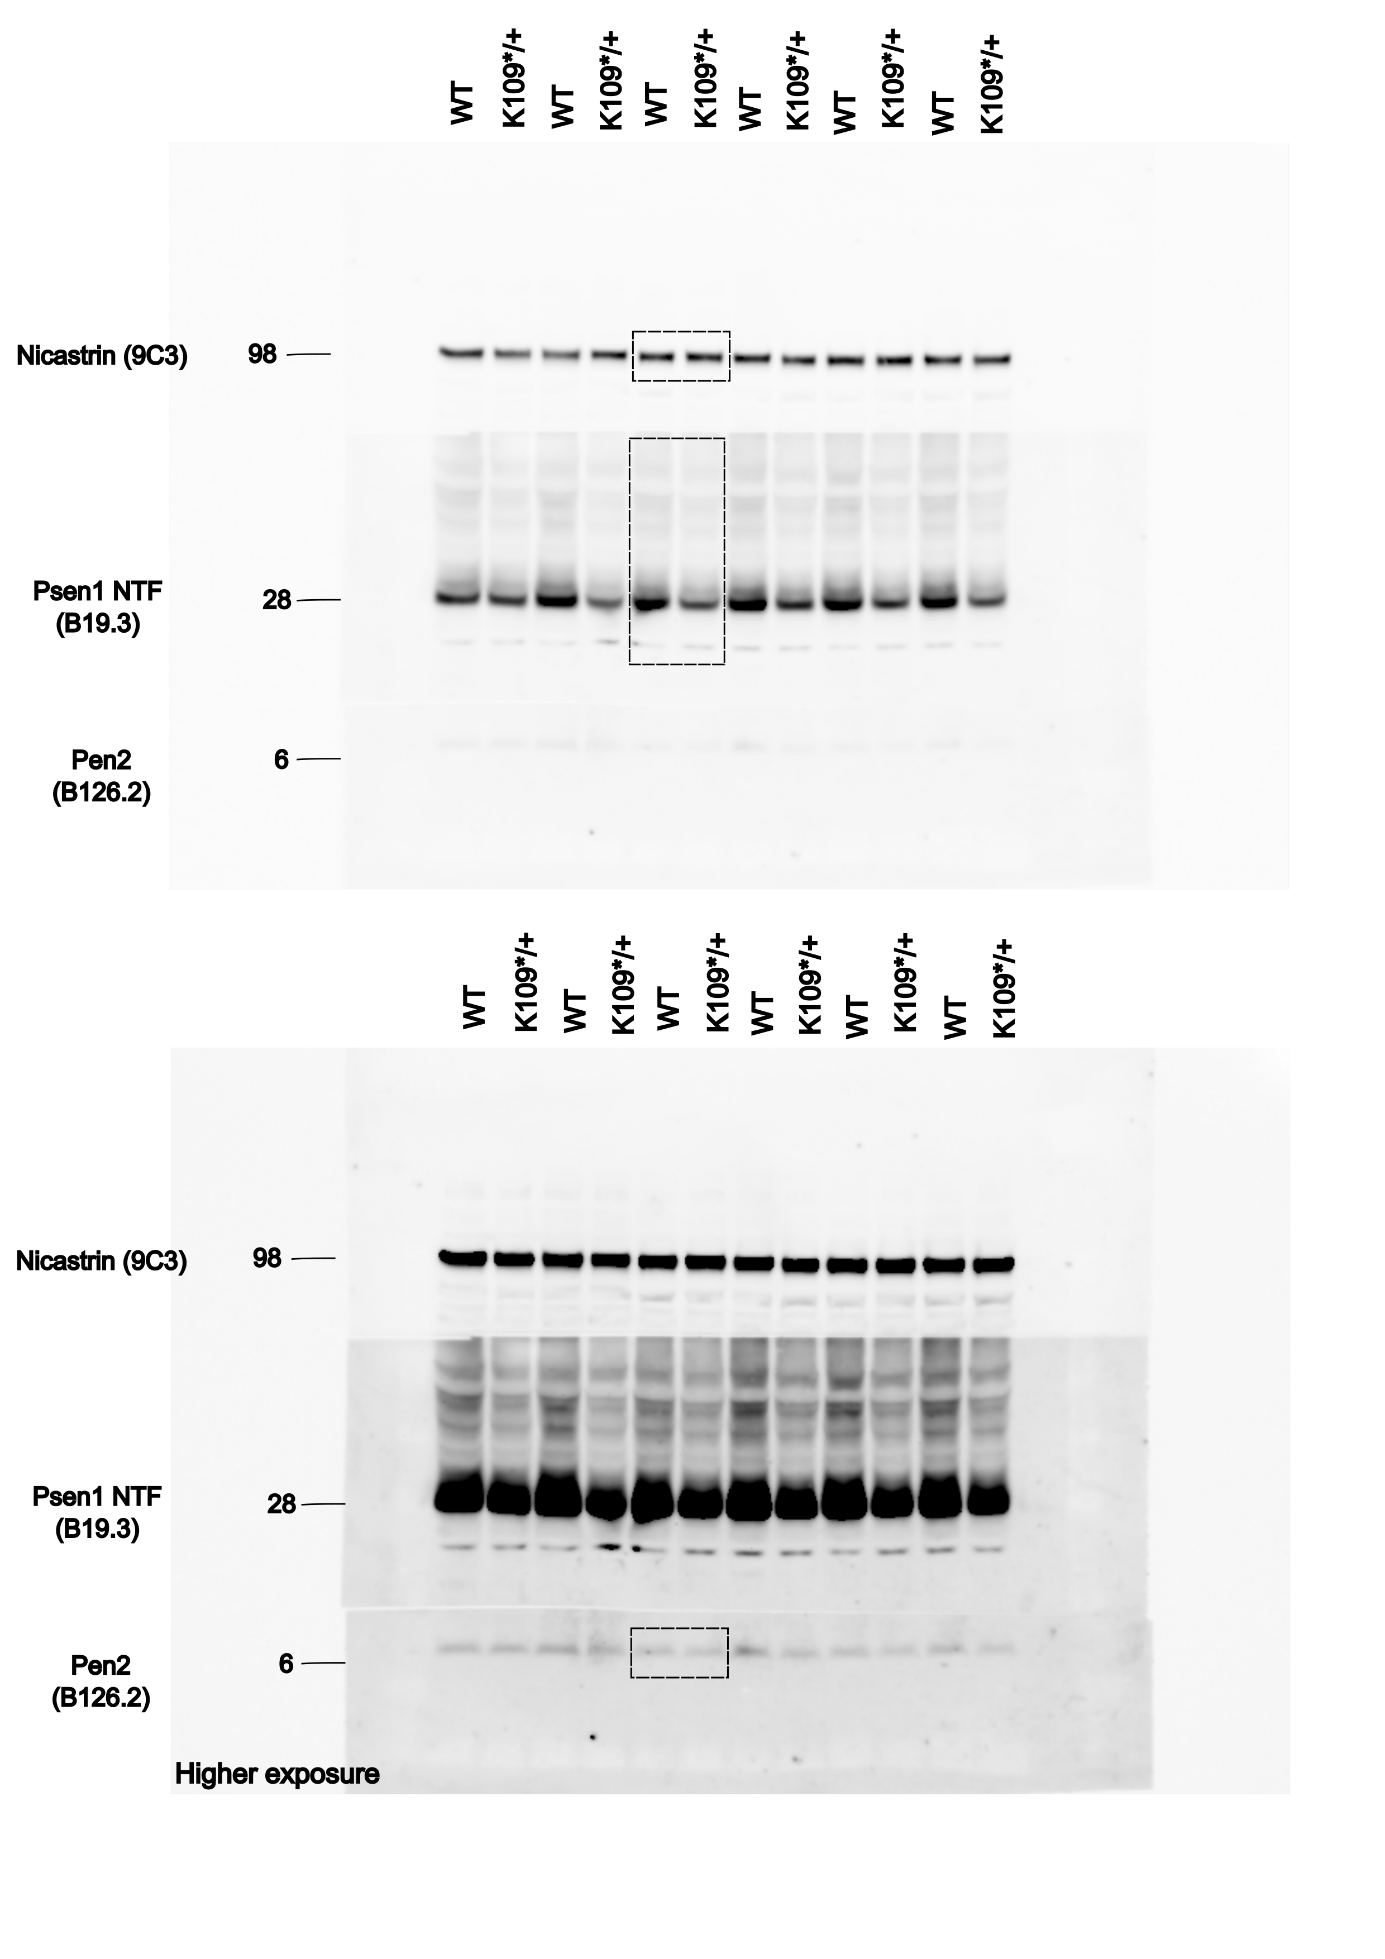


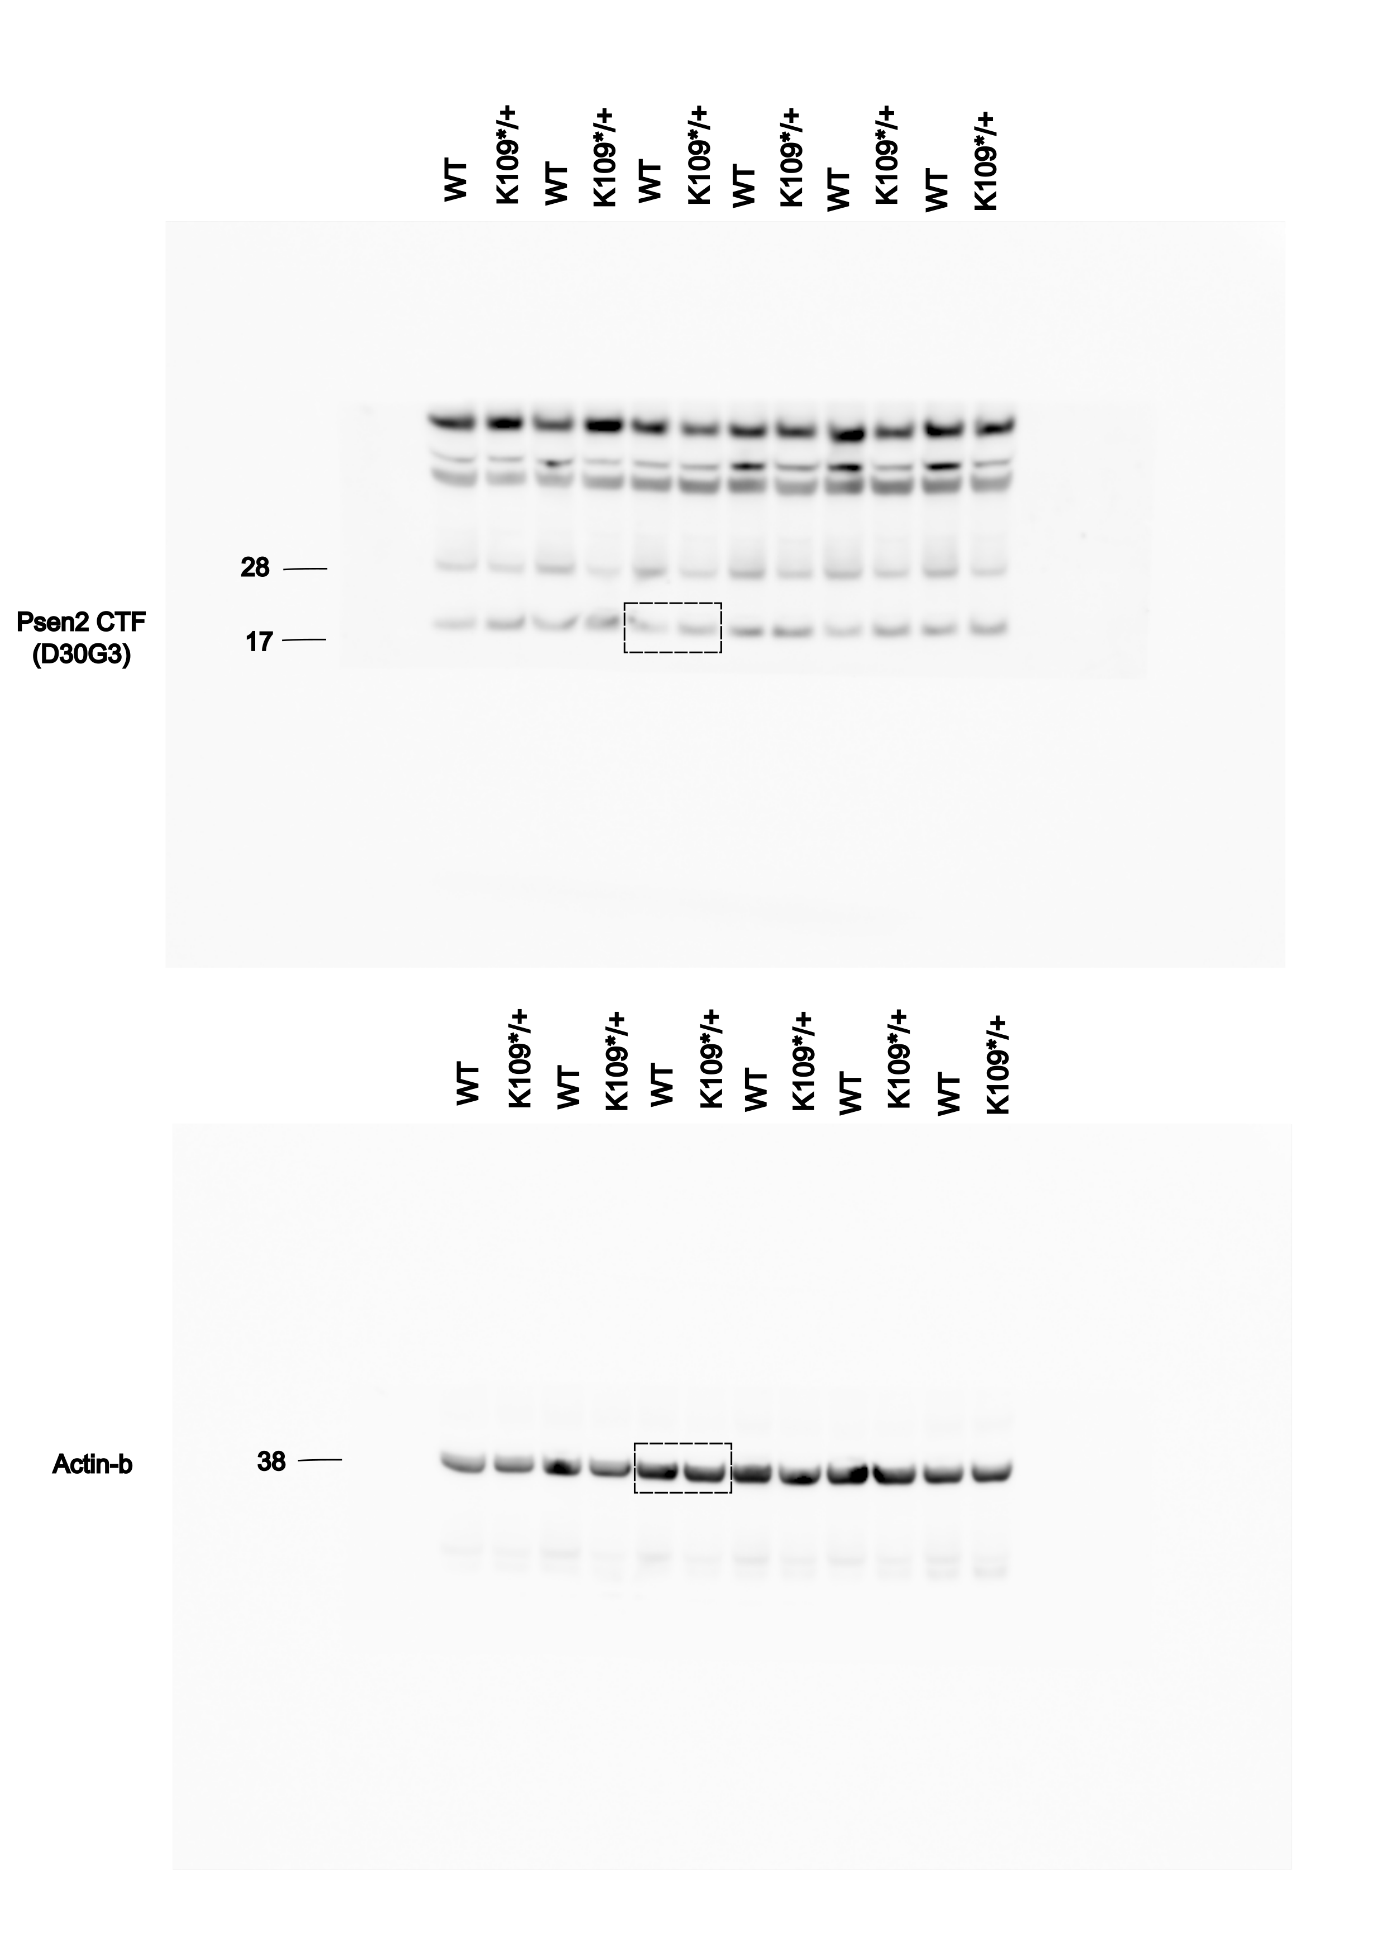


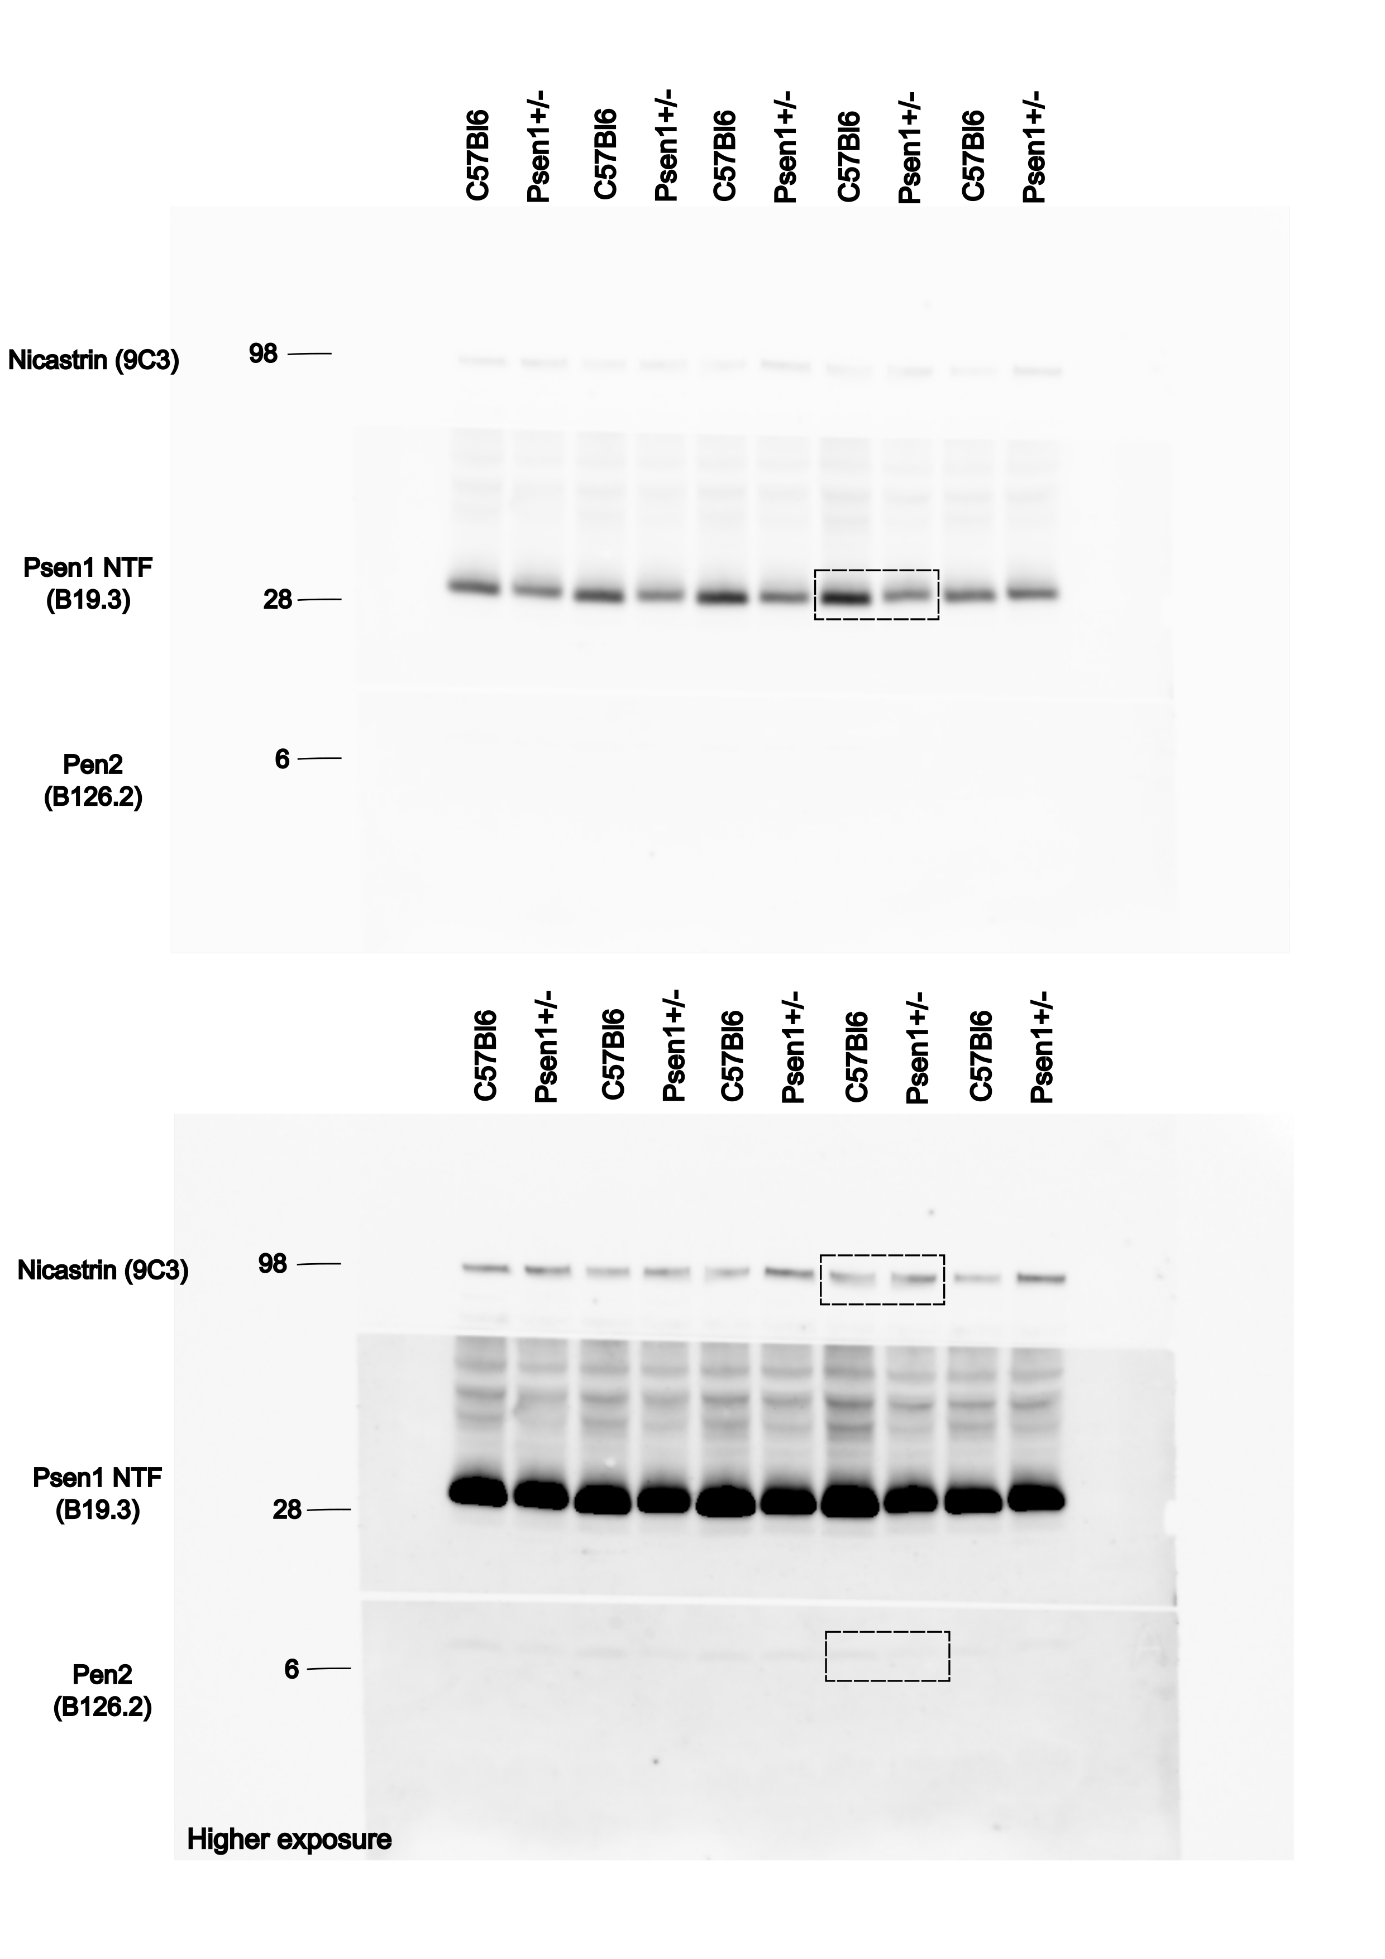


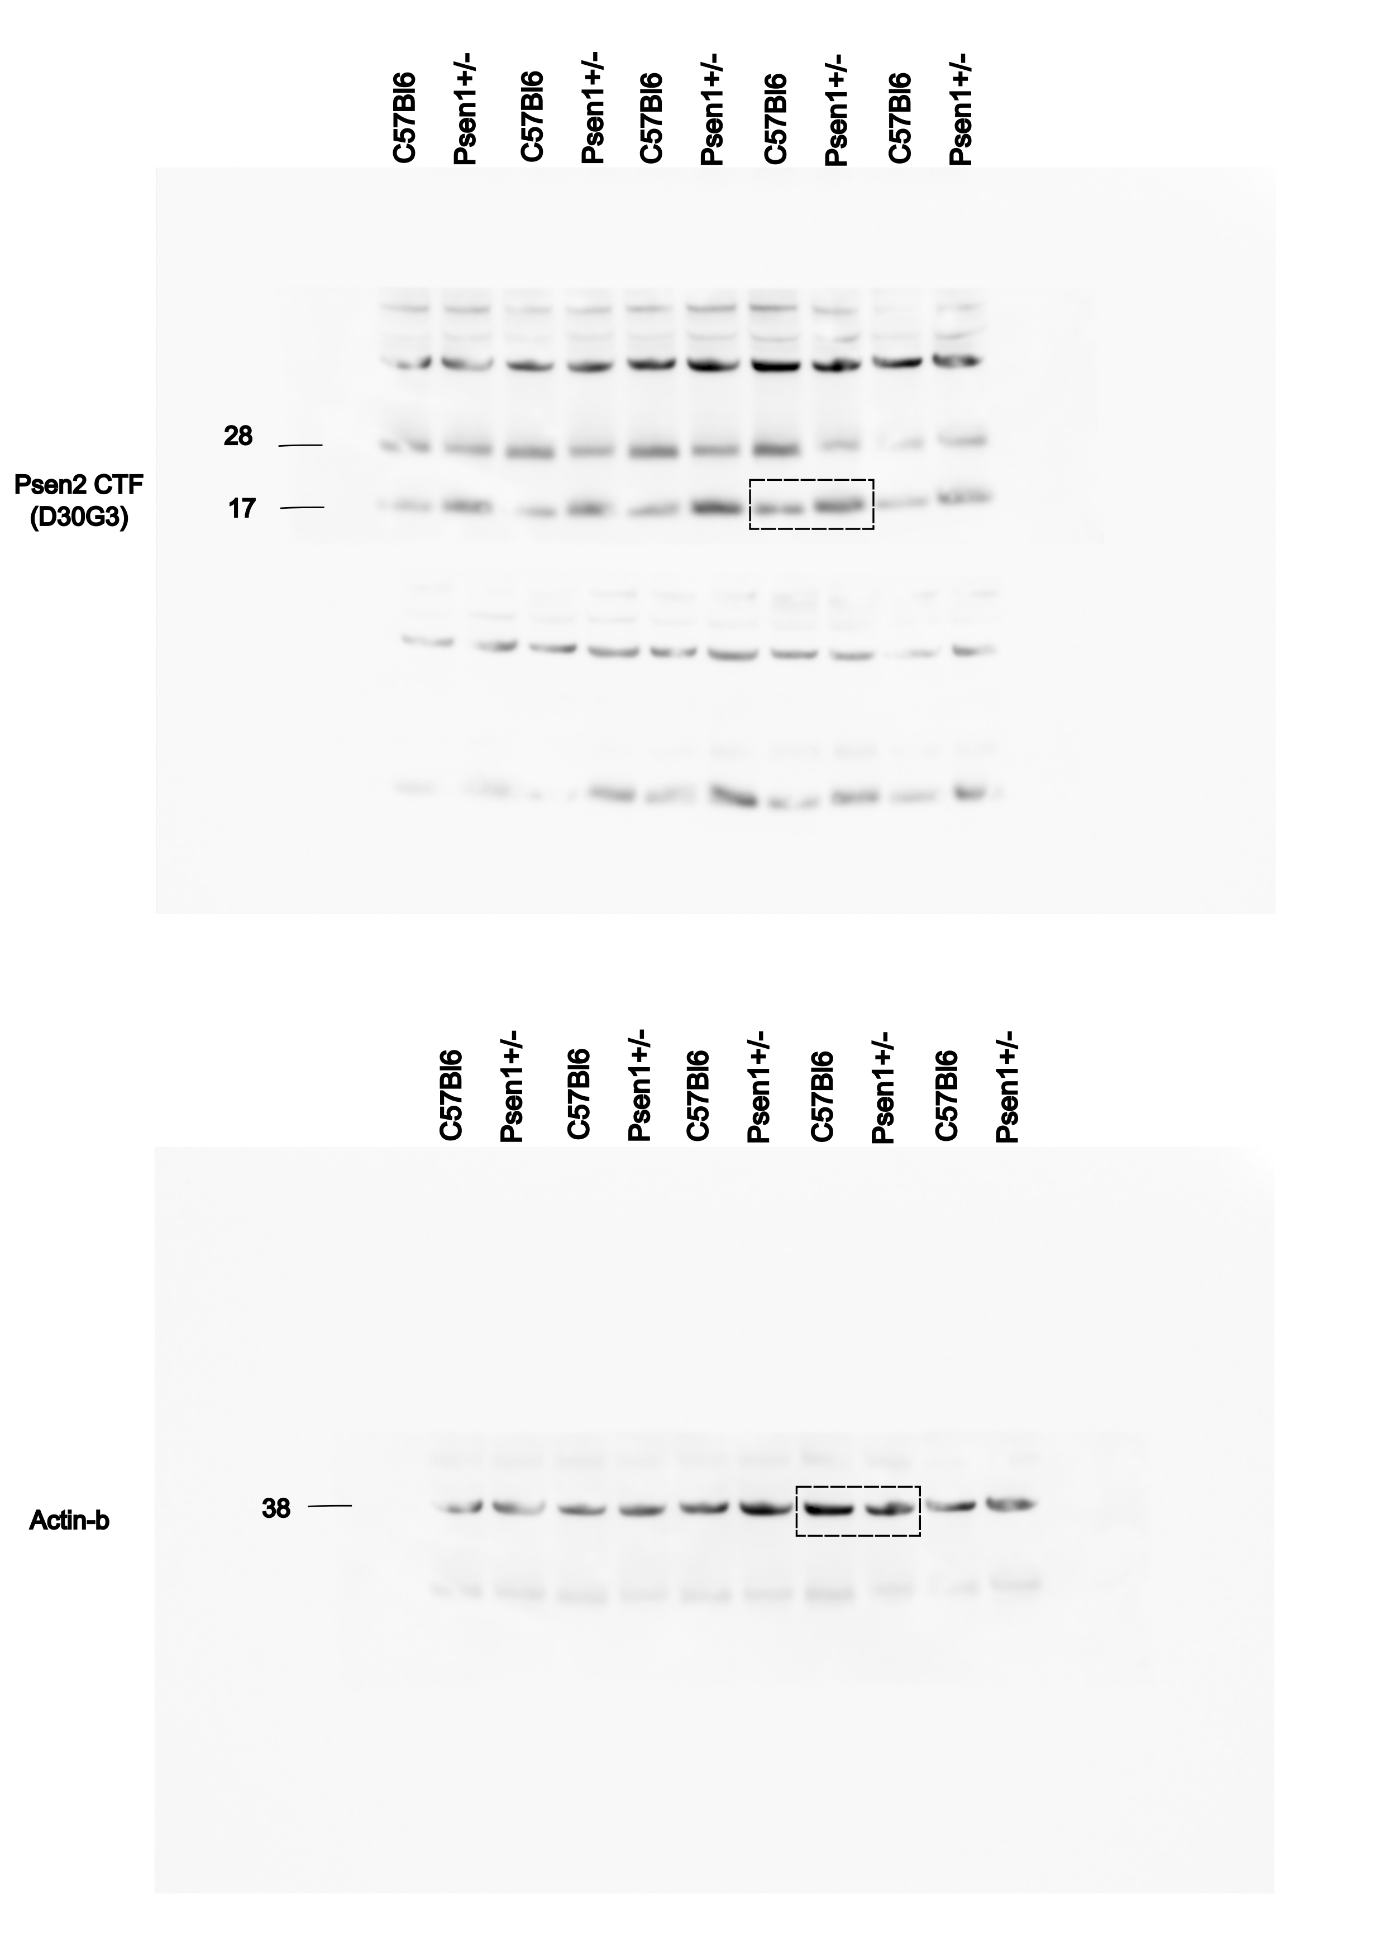


**Figure 5: *hPSEN1K109** short fragments do not reconstitute γ-secretase enzymatic activity.**

**A**


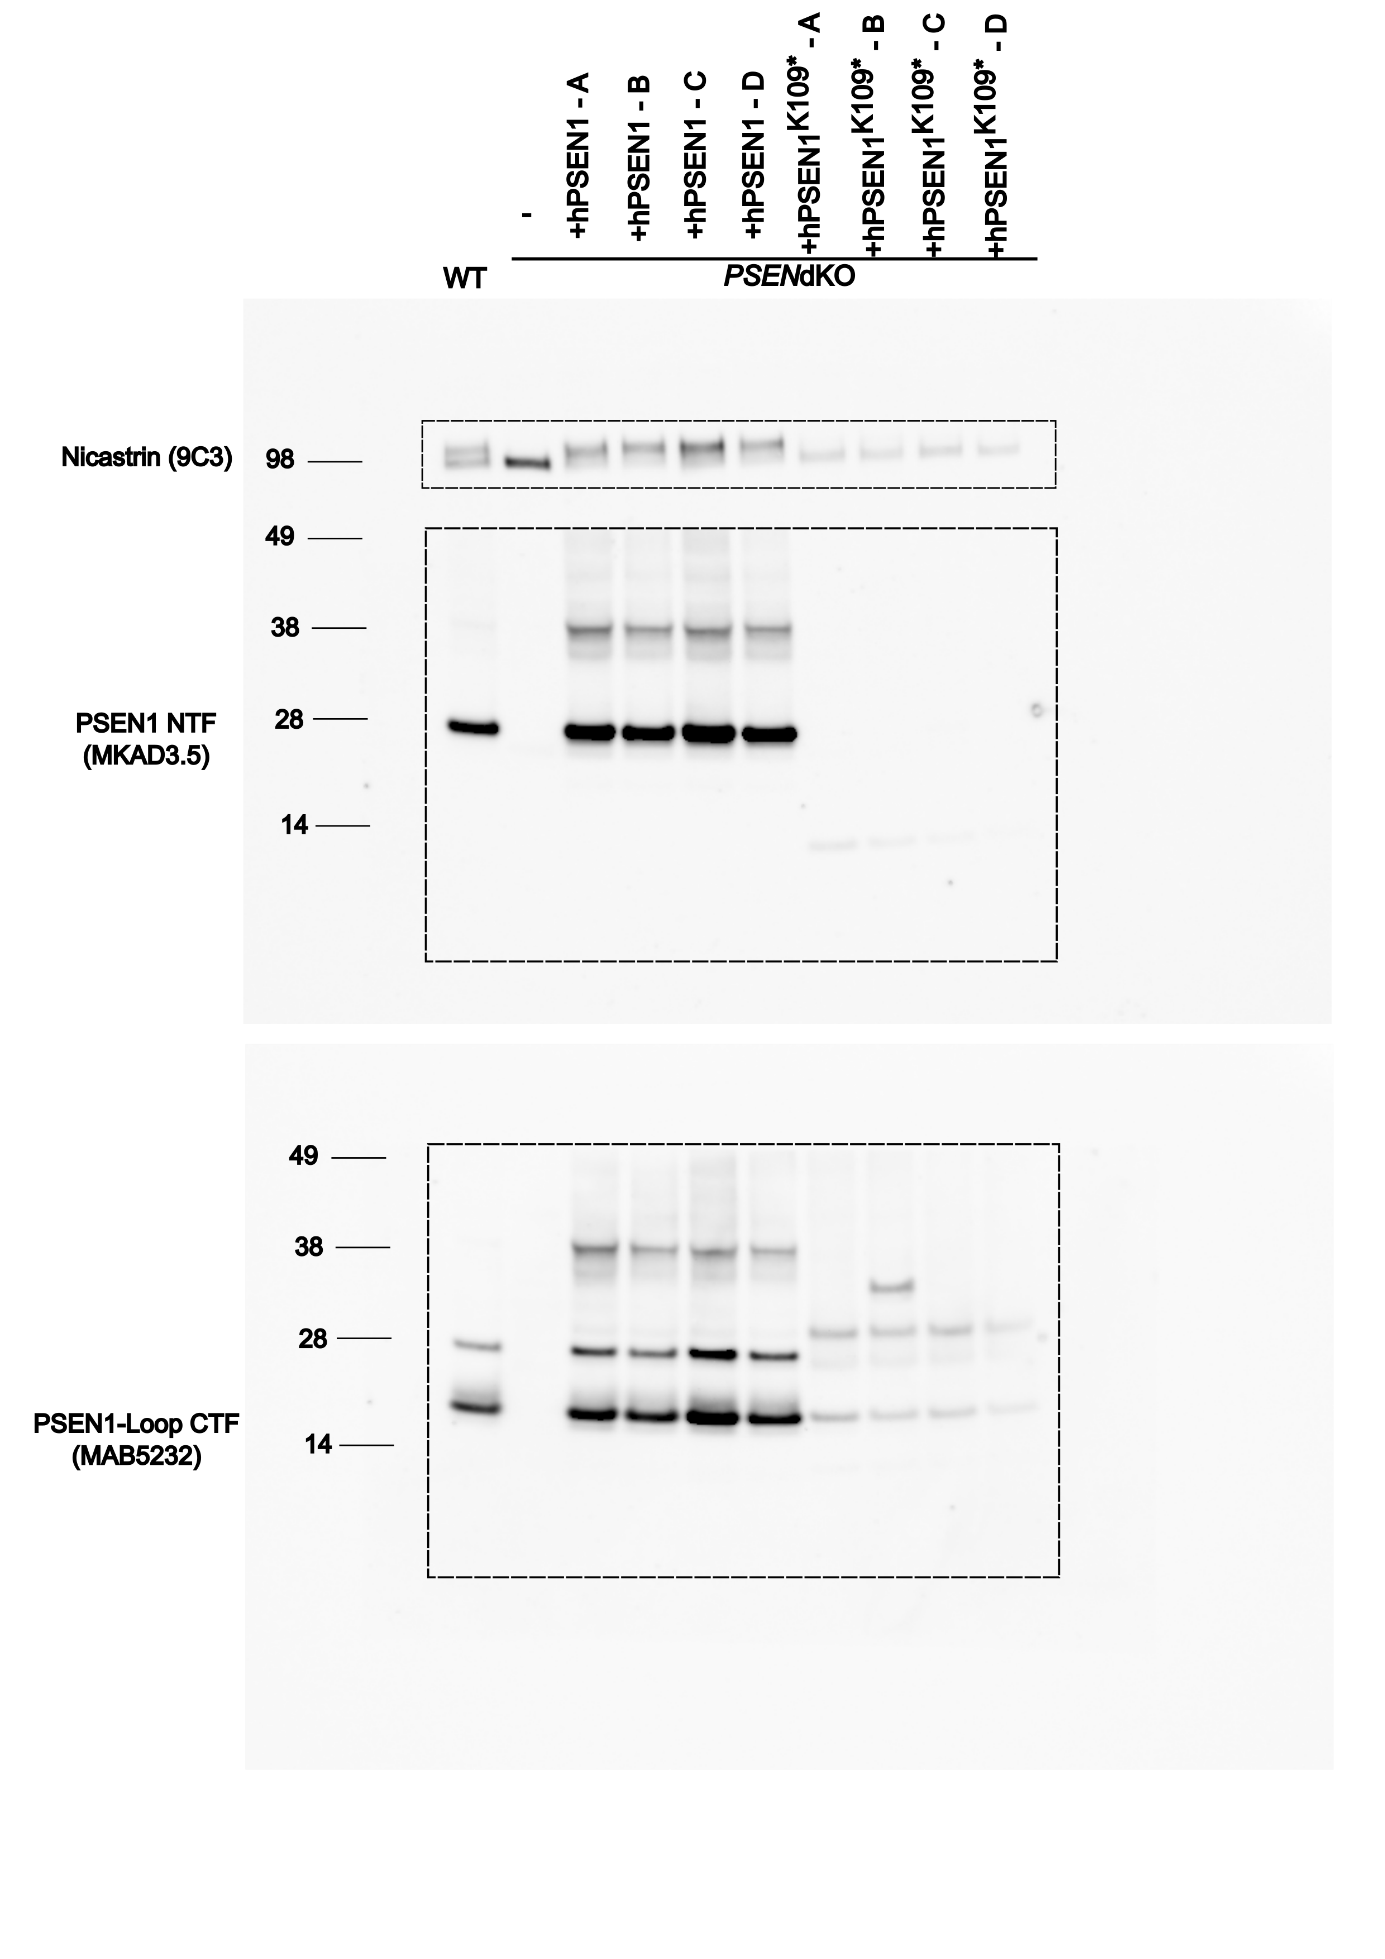


**B**


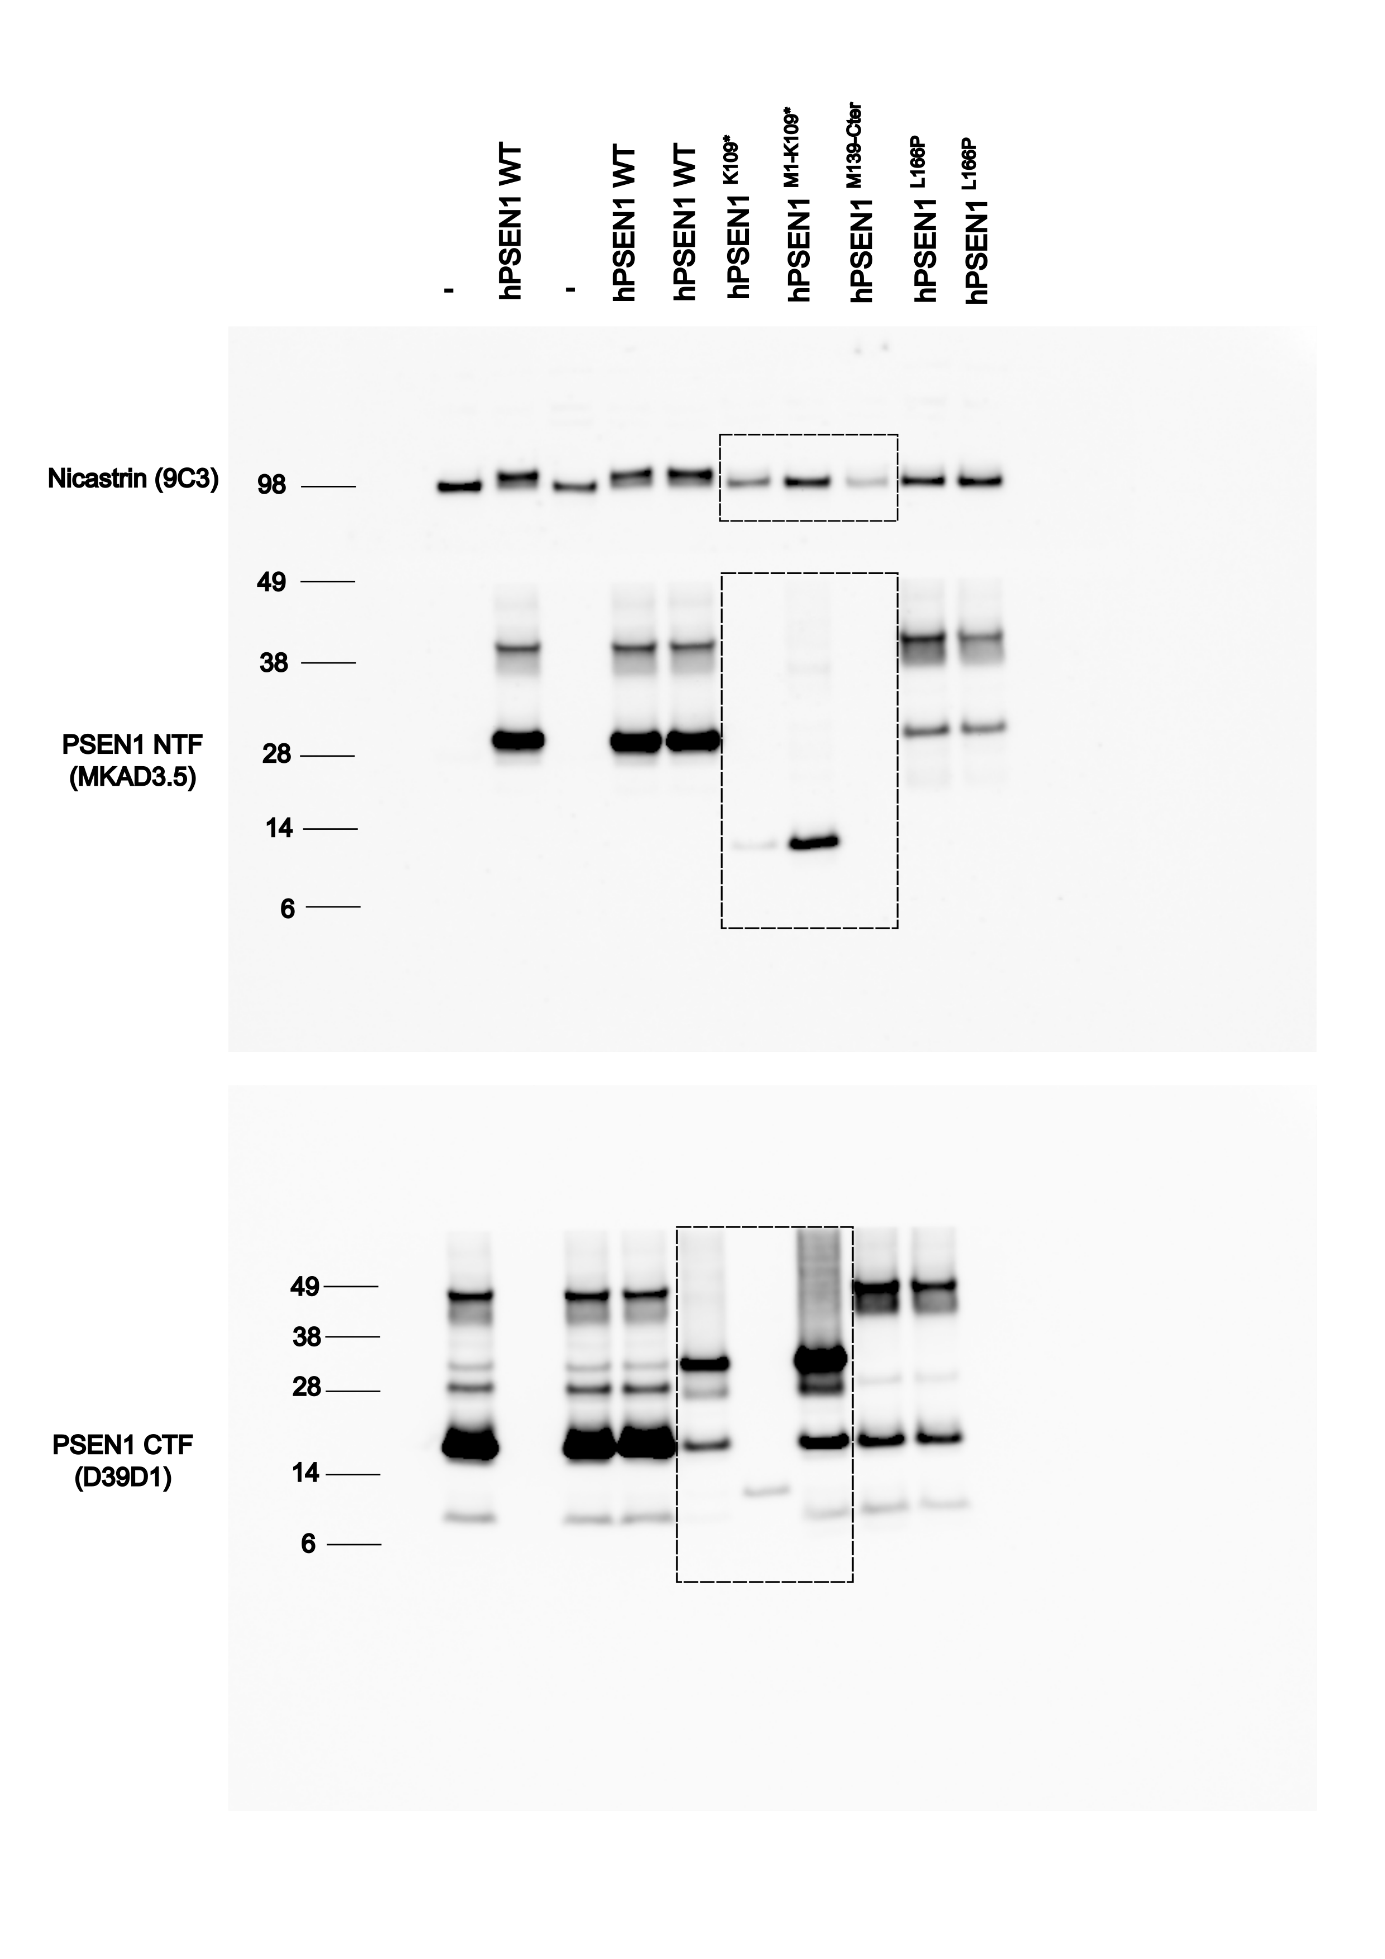


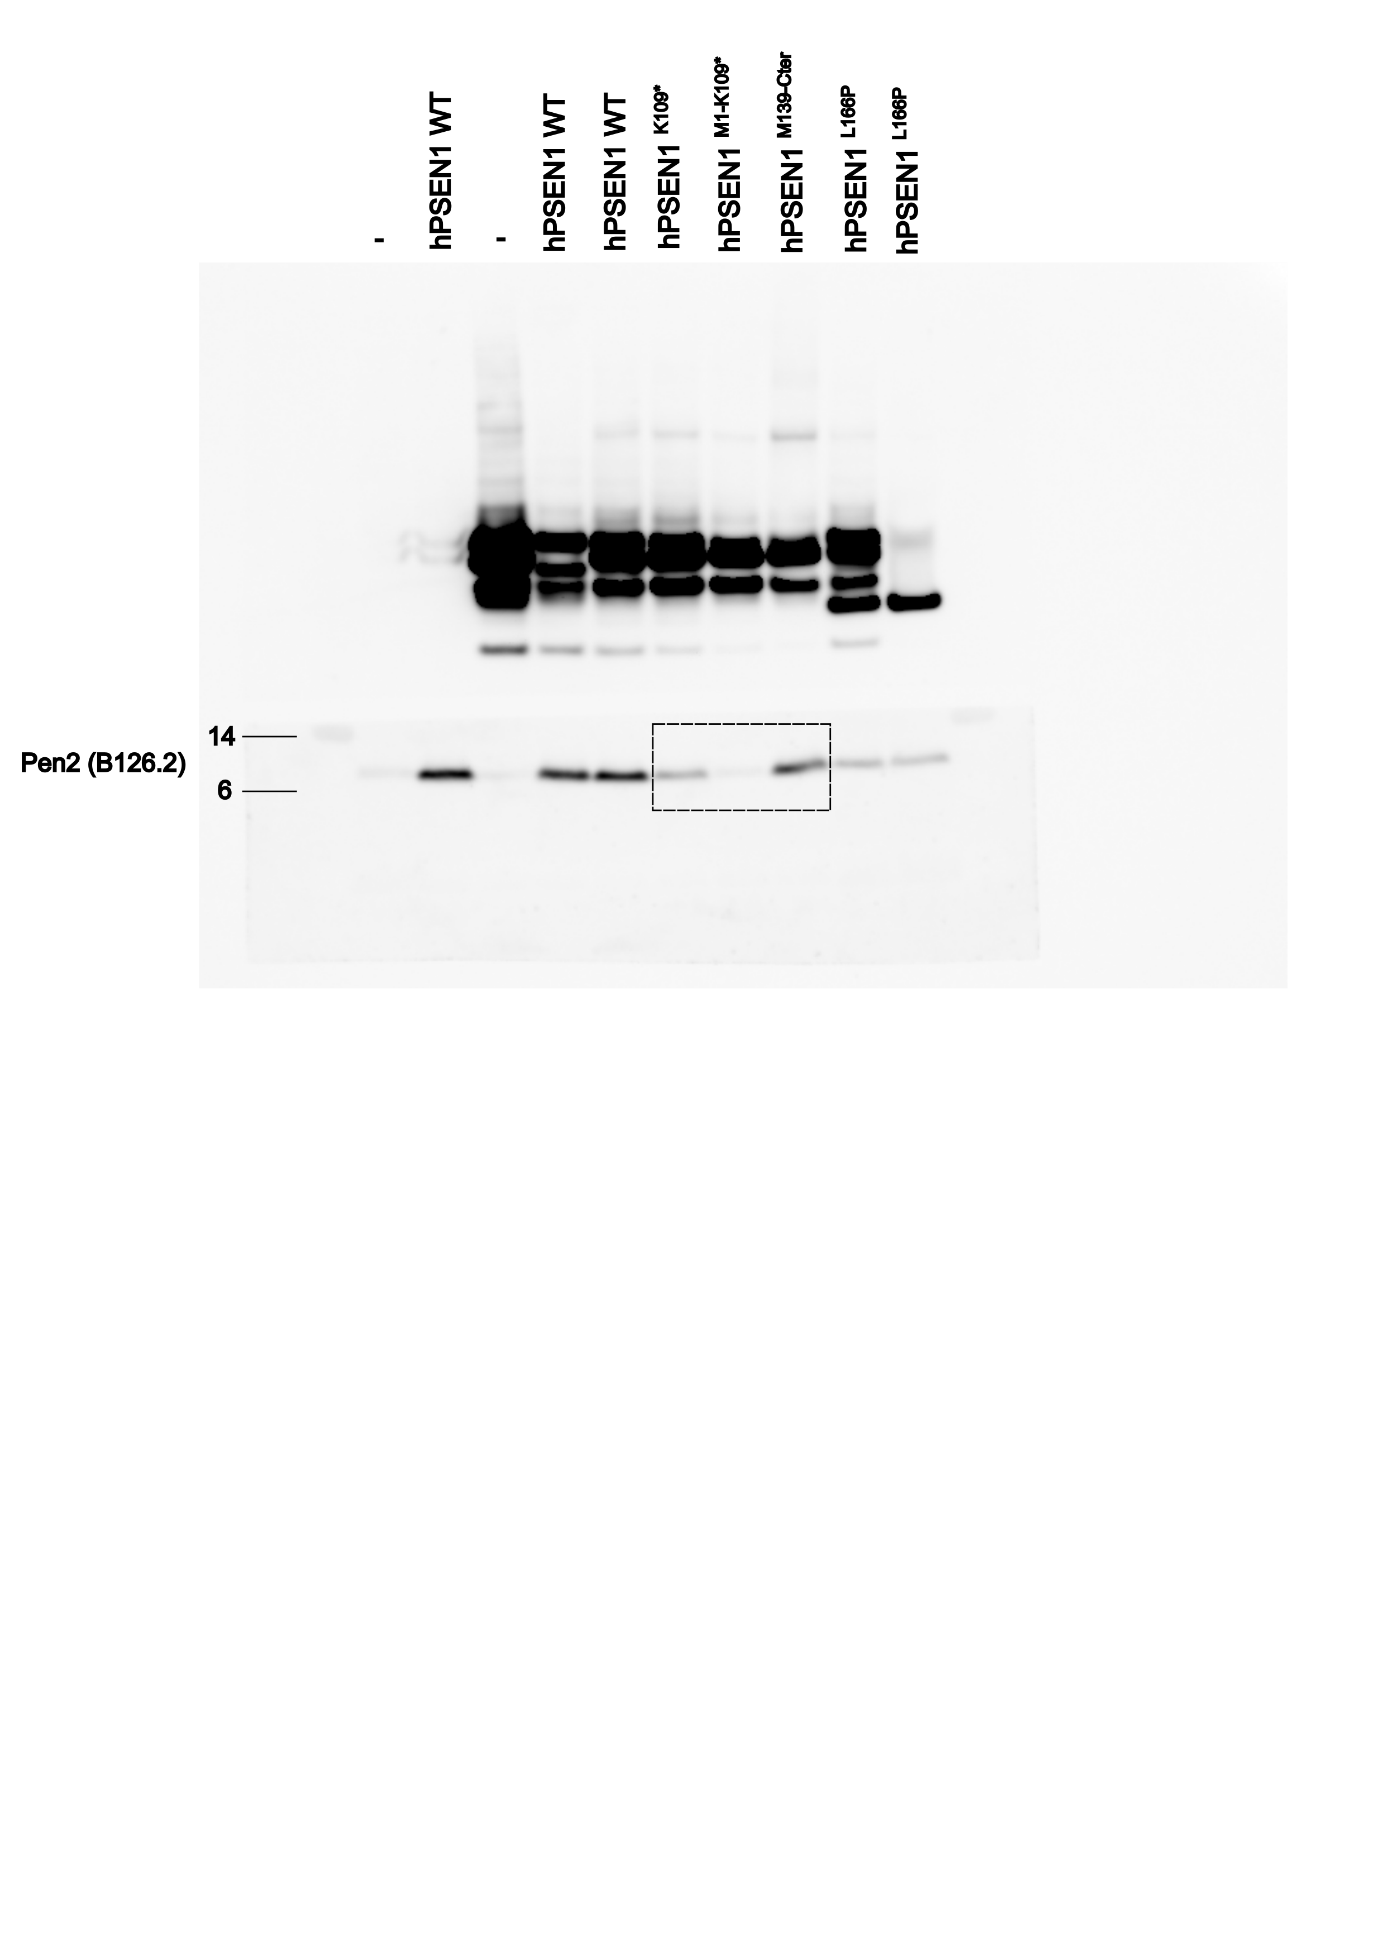


**C**


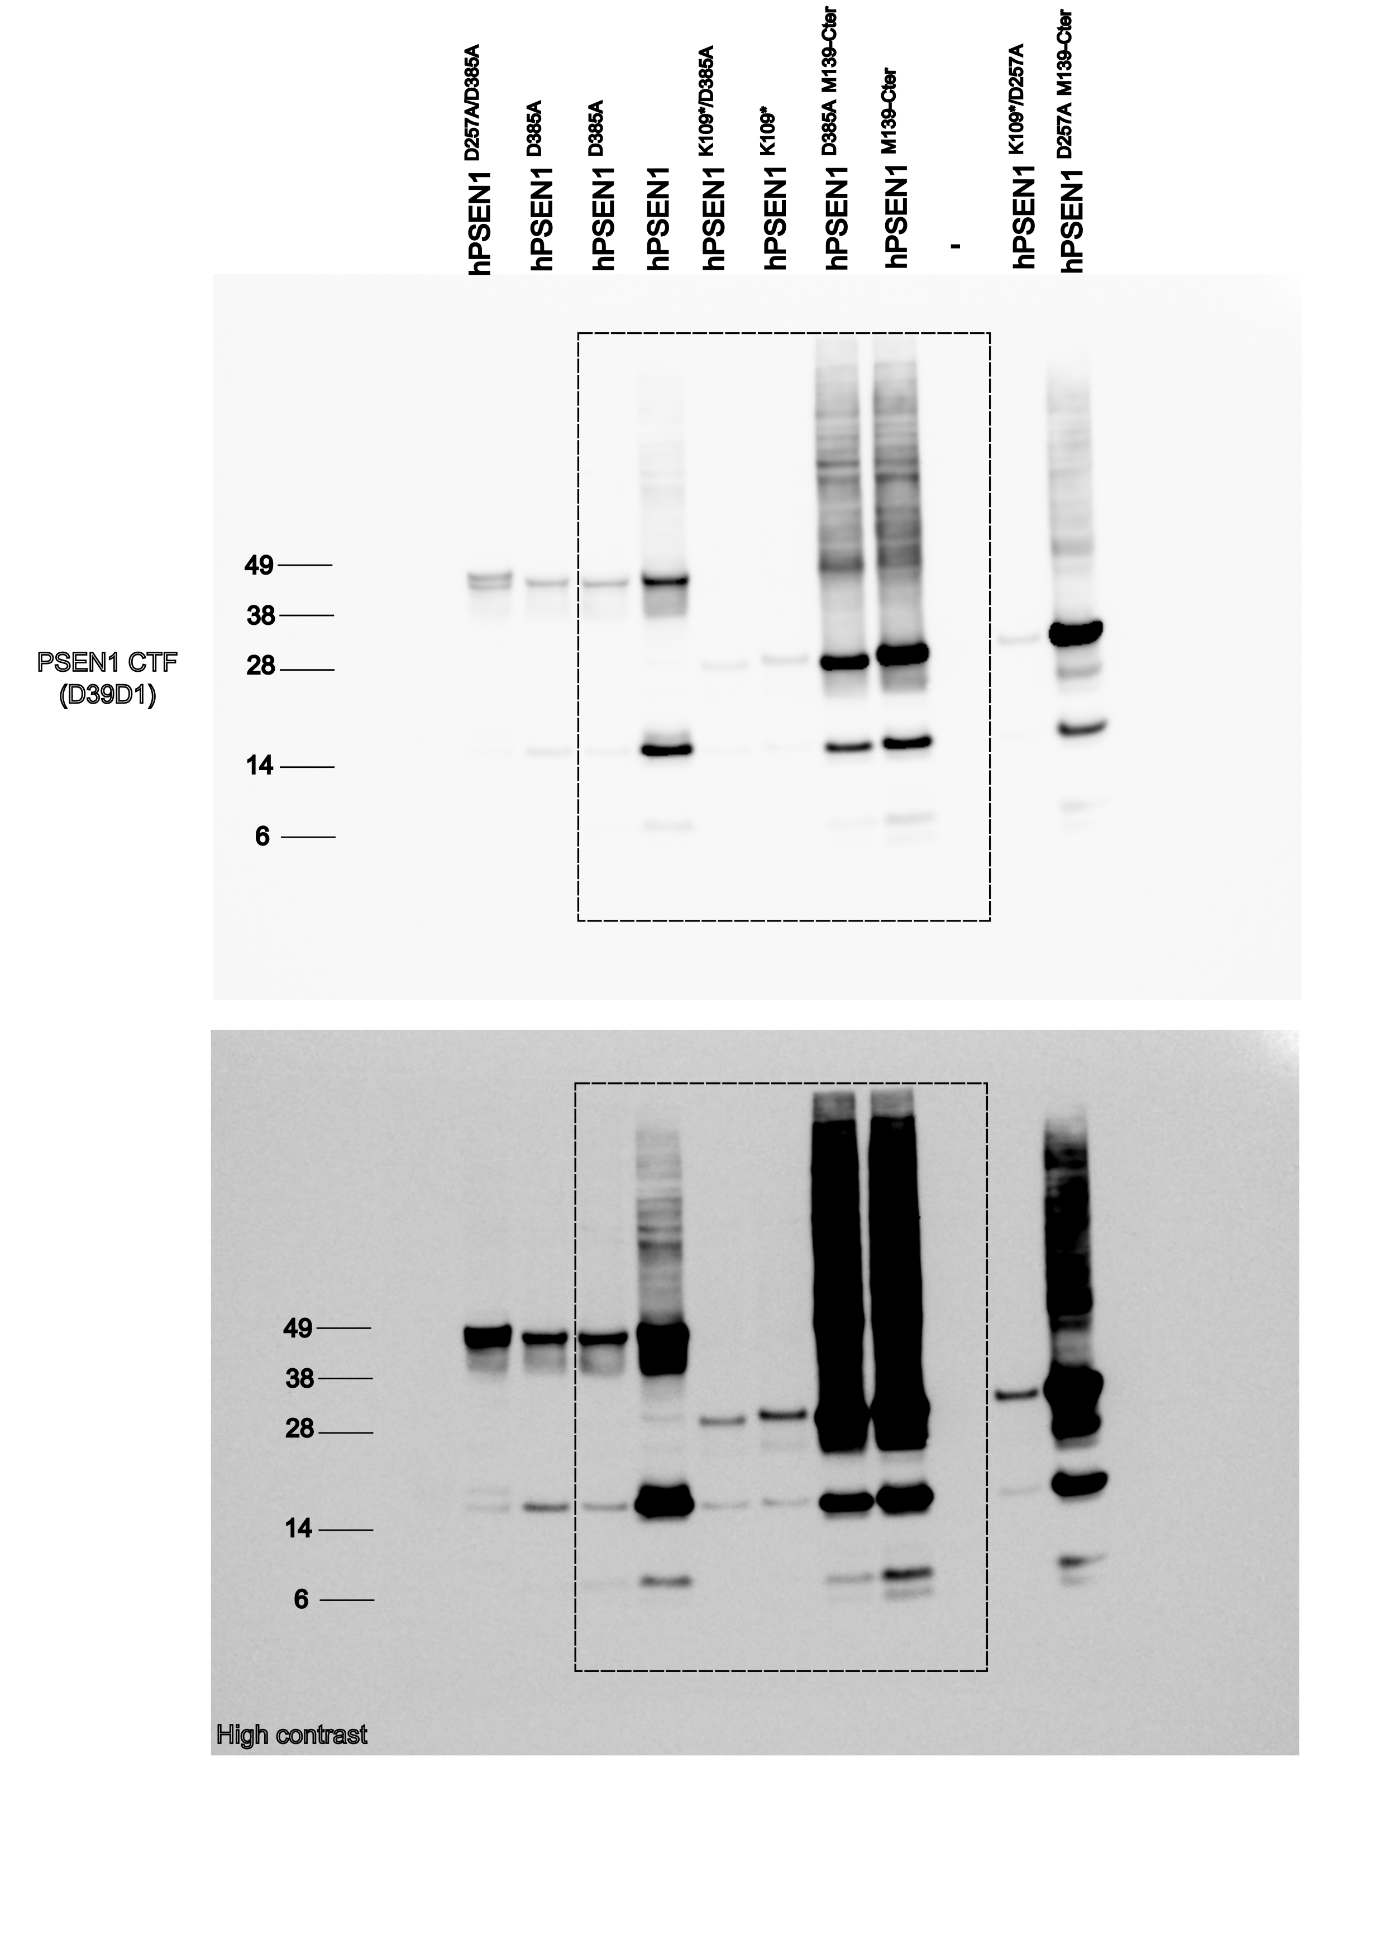


**Supplementary Figure 1: PSEN1-NTF* (~12kDa) fragment only detected in primary neuronal cultures.**

**A**


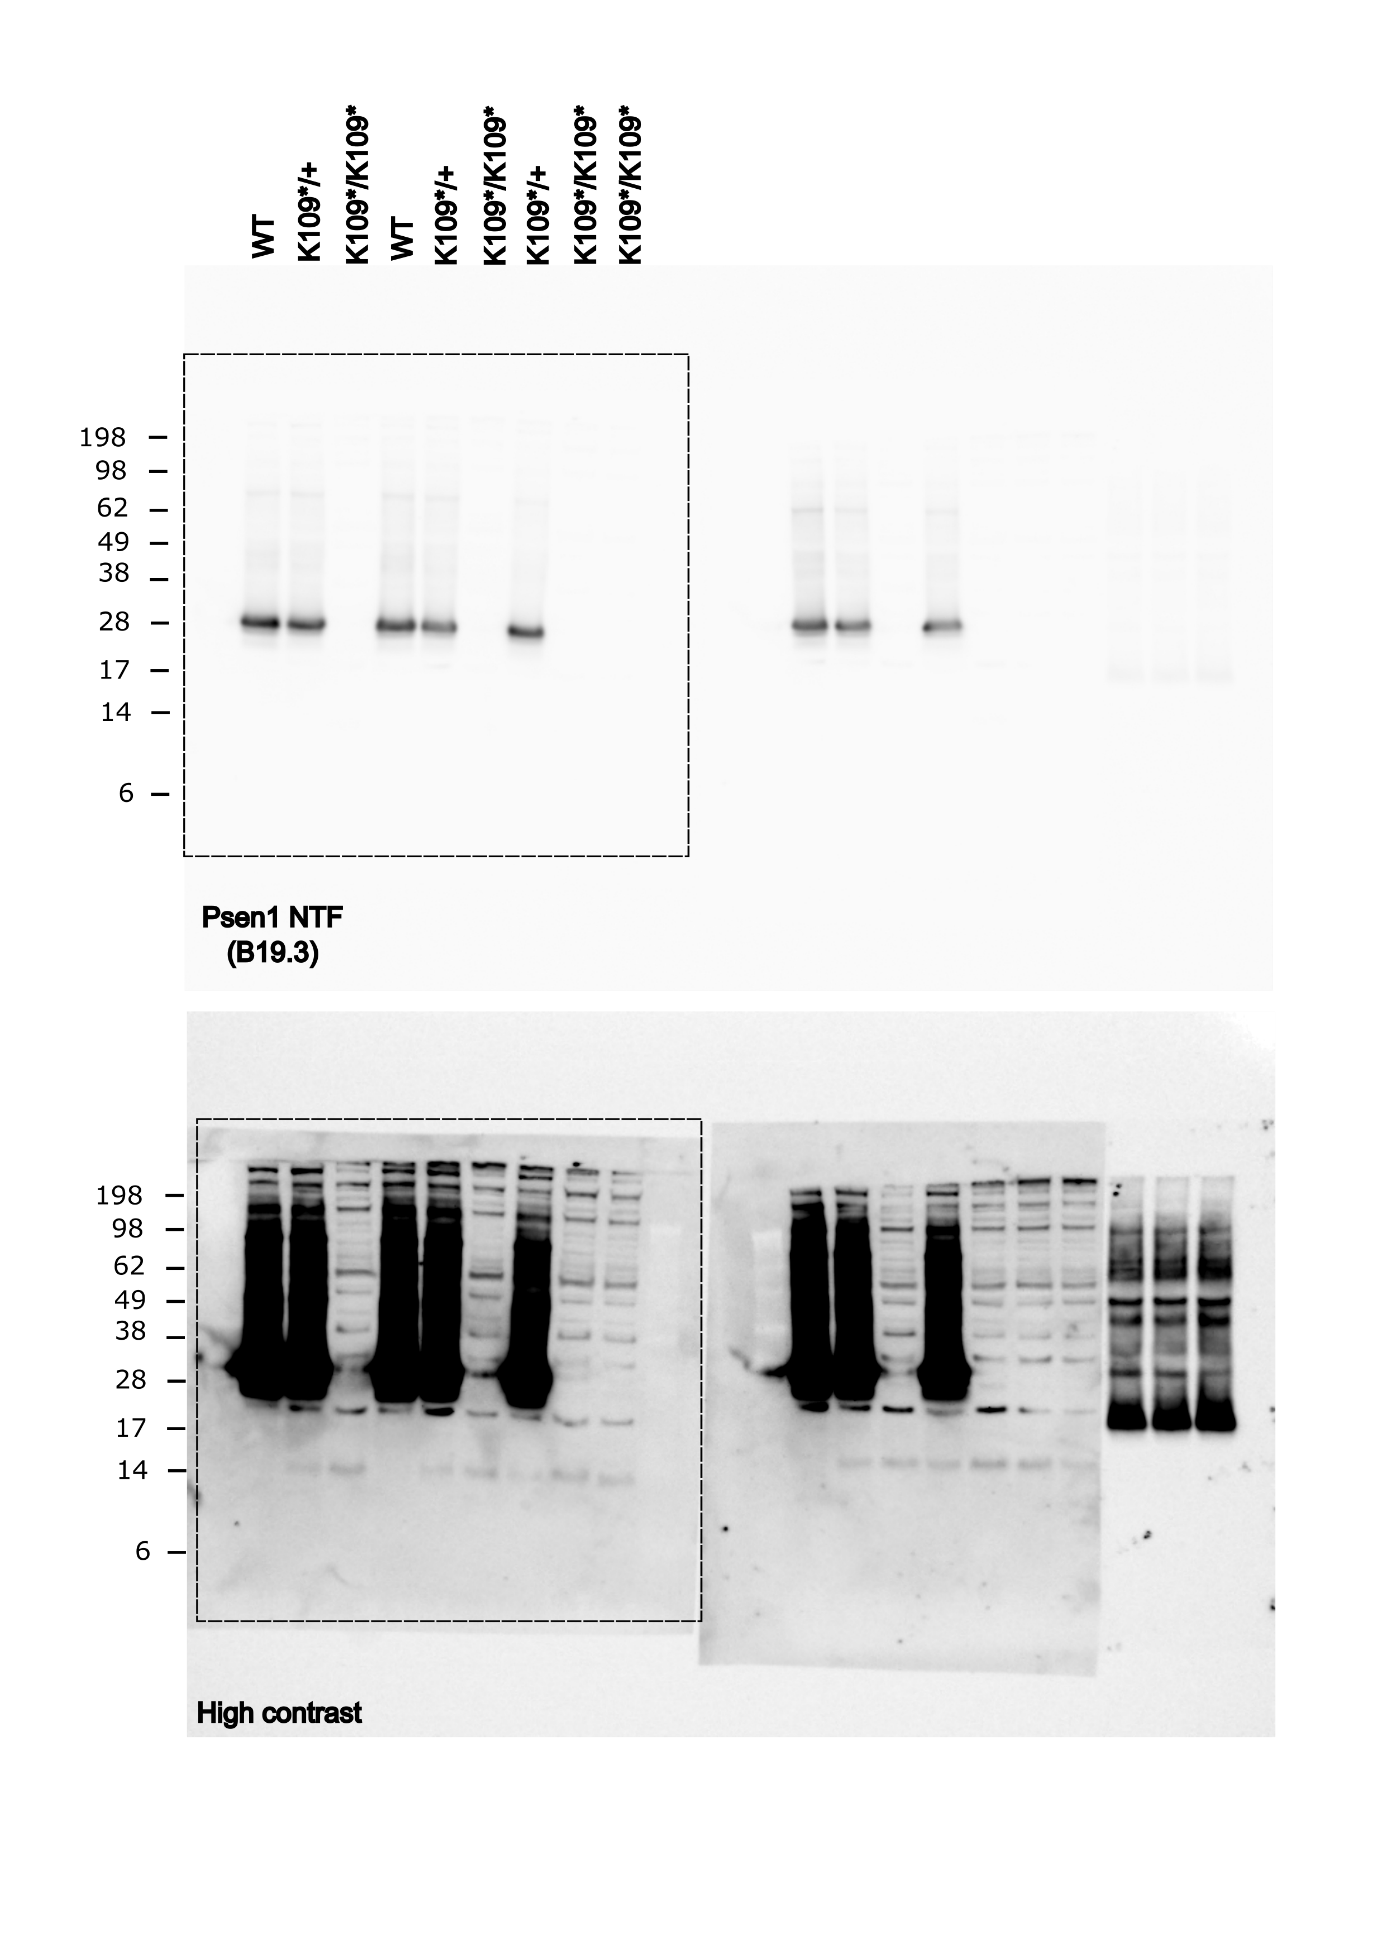


**B**


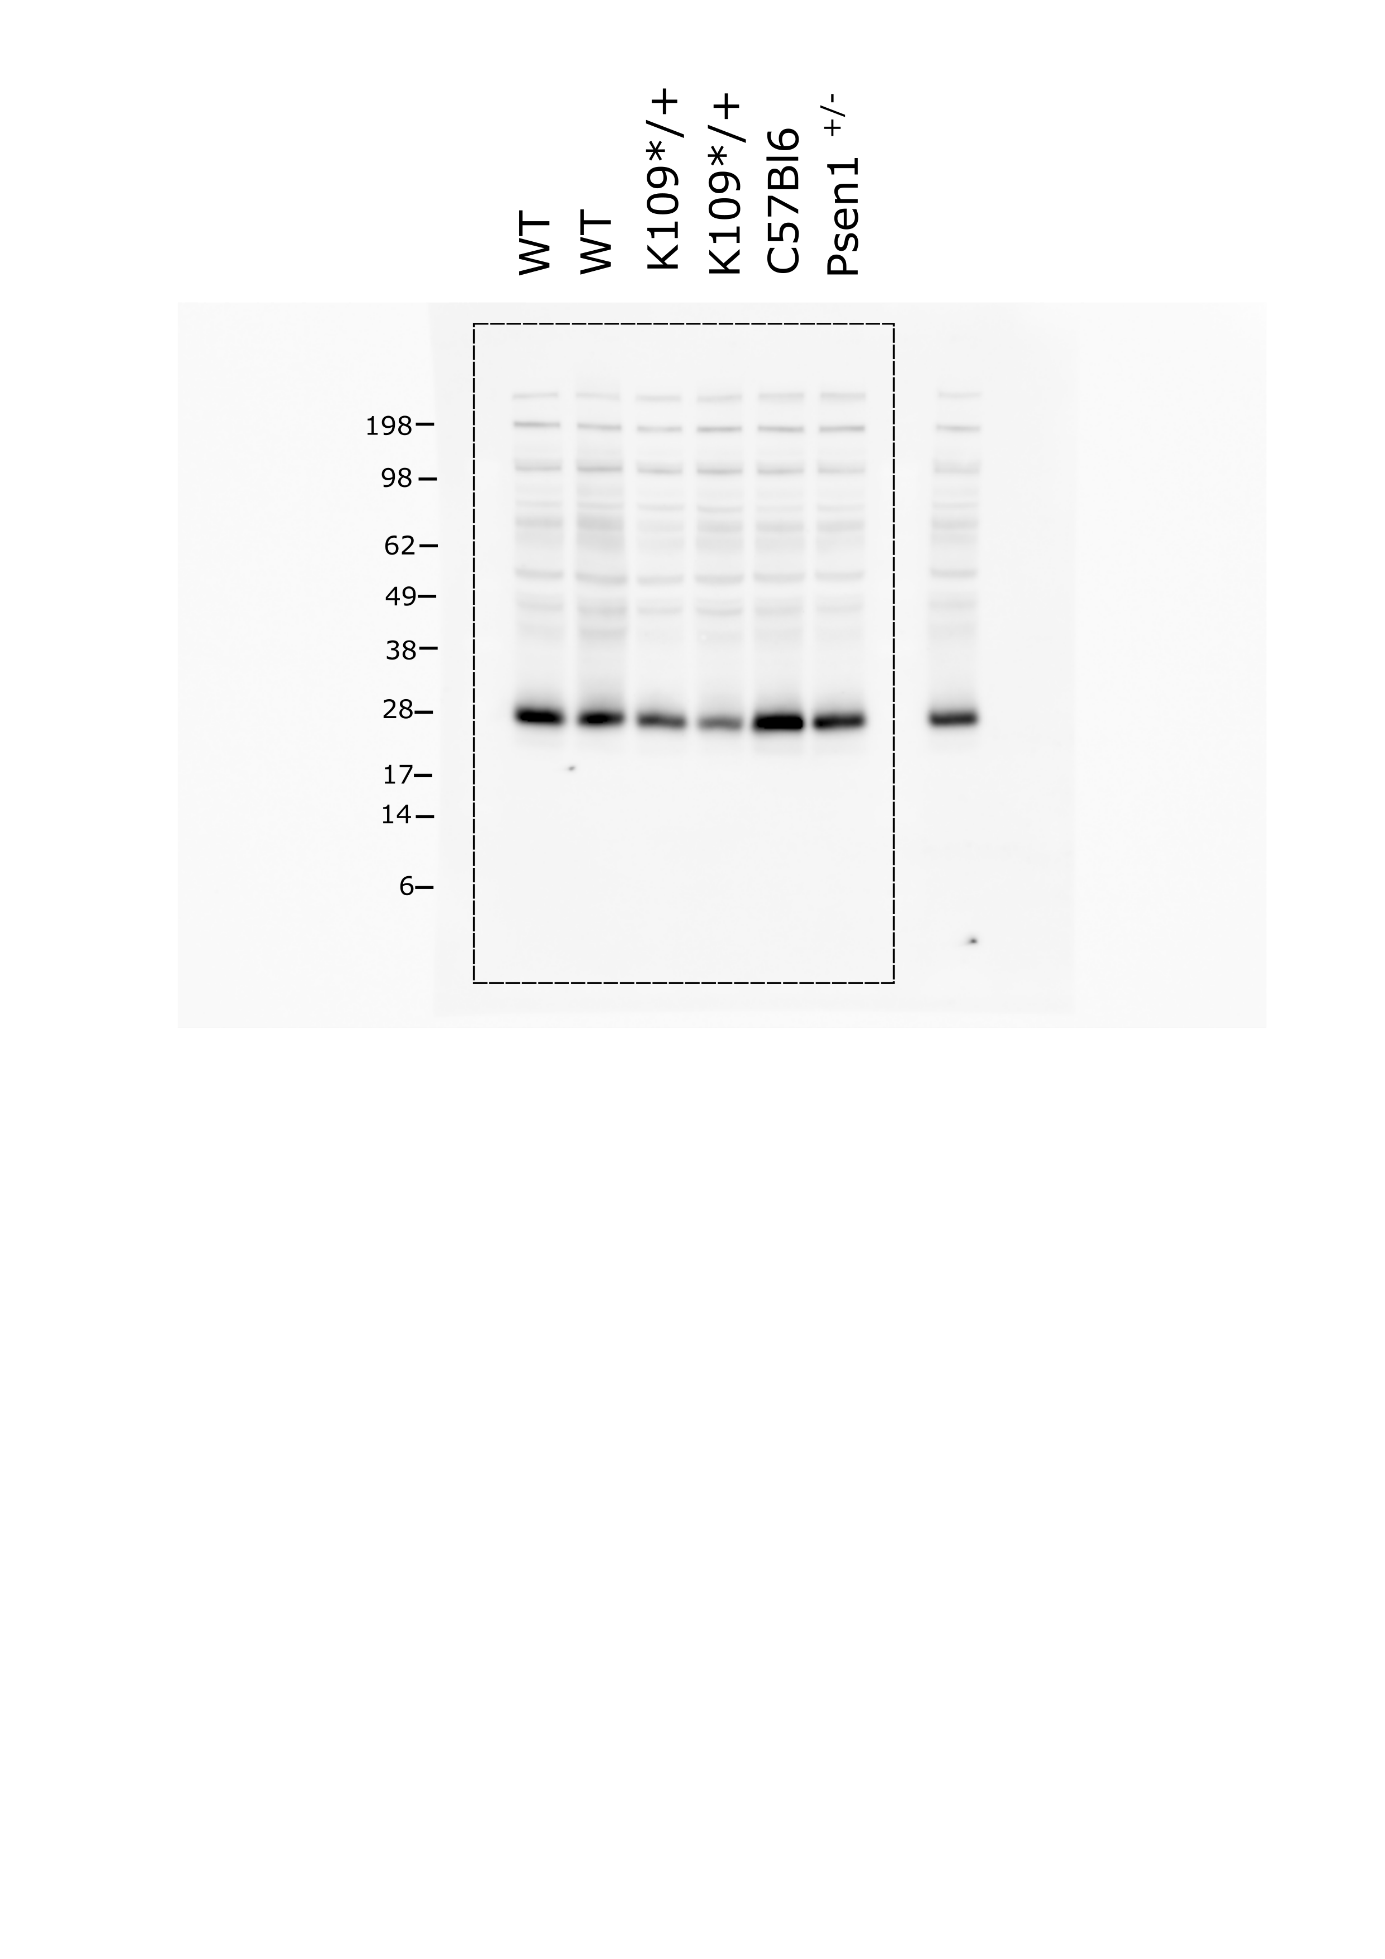


**C**


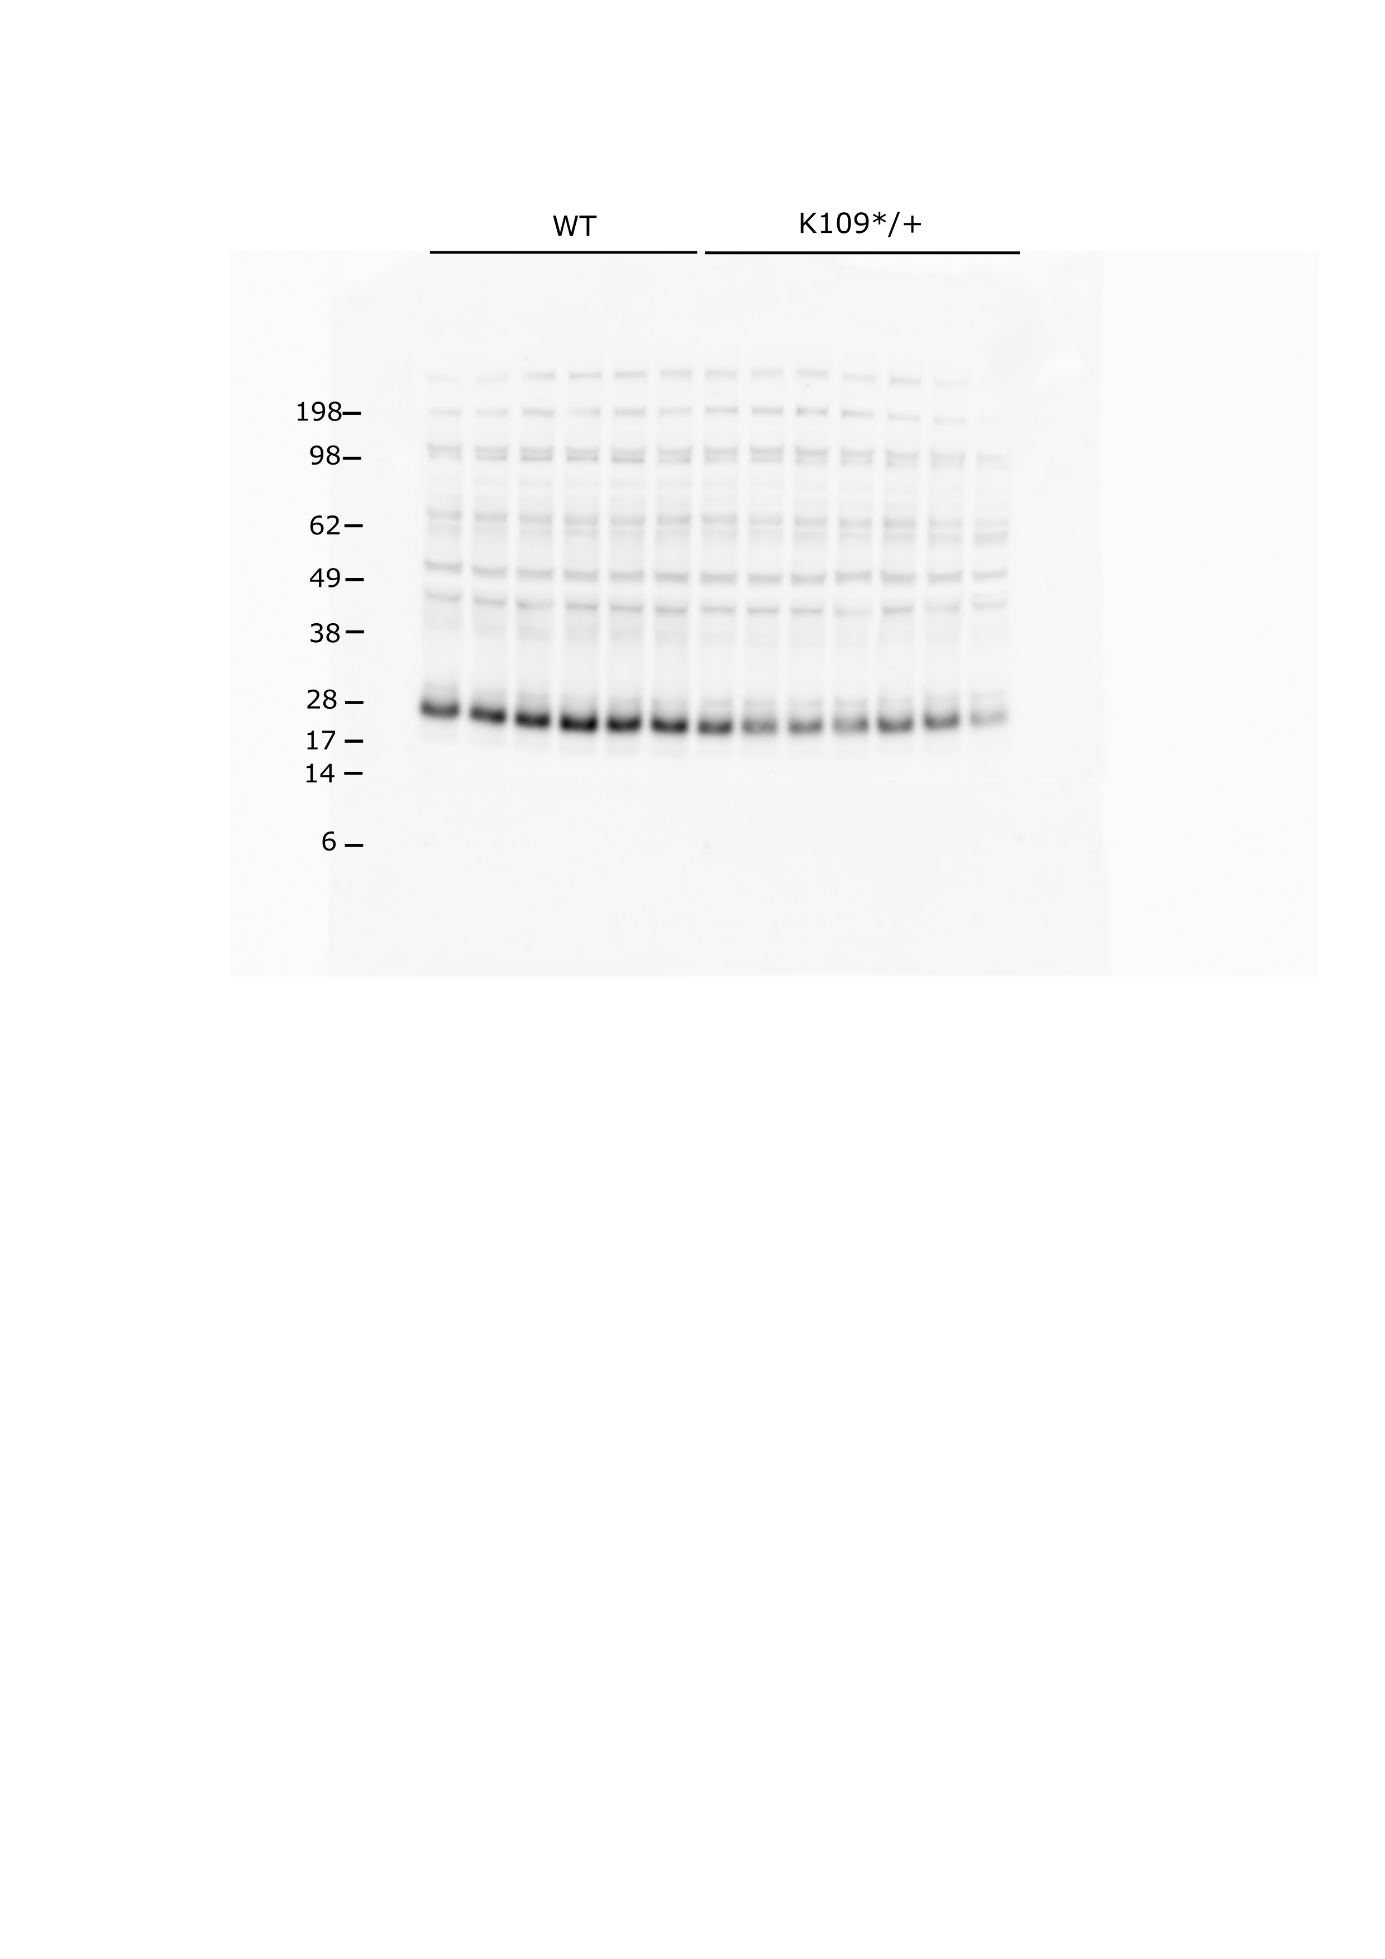


**Supplementary Figure 4: Human *PSEN1* p.K109* variant and its fragments do not confer γ-secretase activity**

**B**


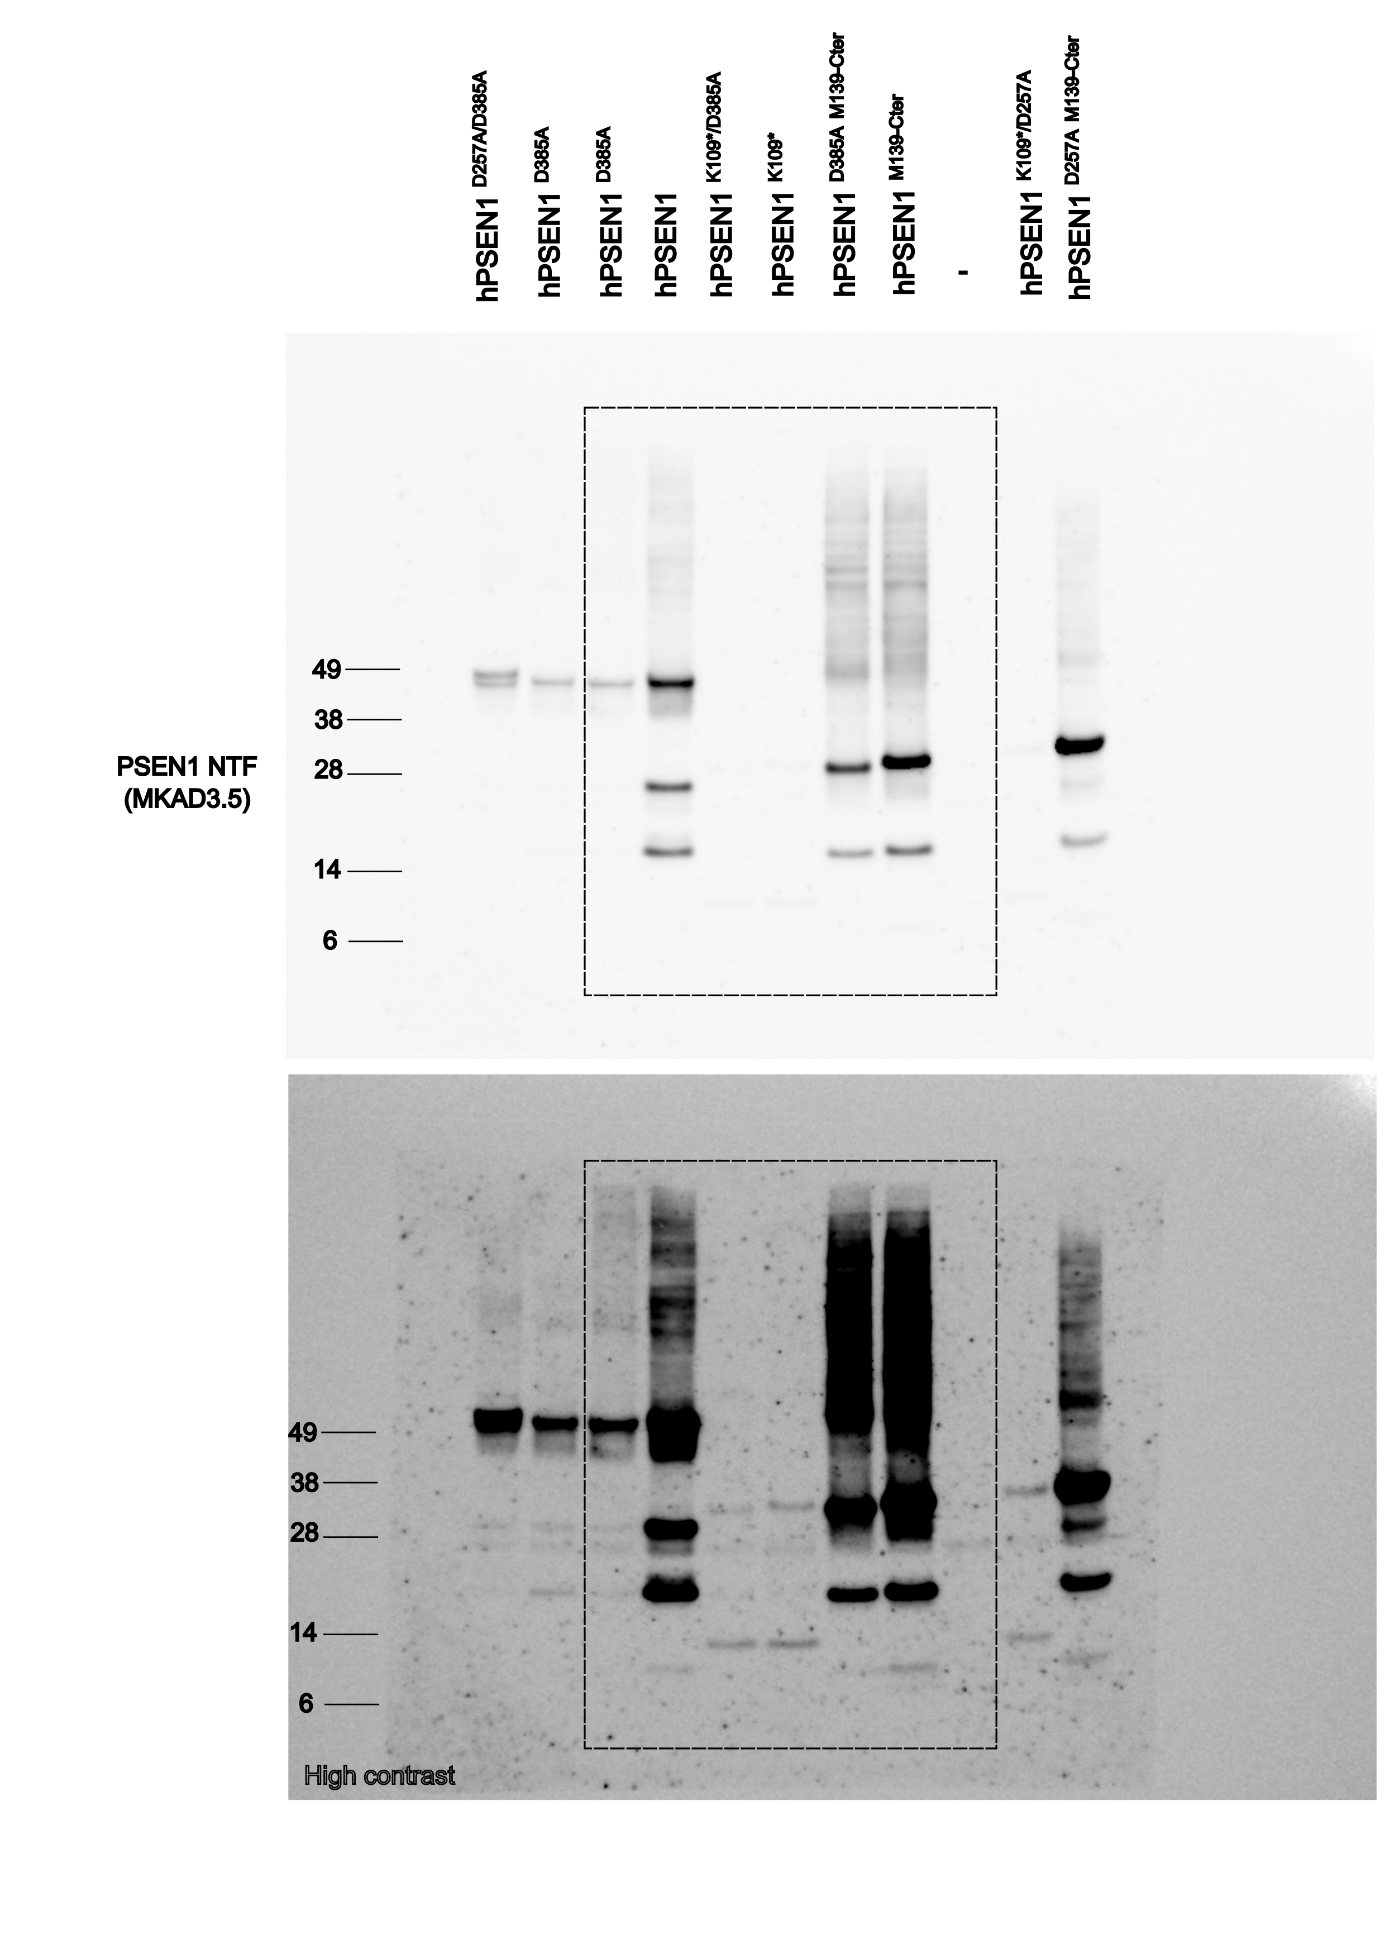

Supplement: Supplementary file 2 [file 963c9b50b5ca7d2c18f0bce3.docx]
